1 Macrophage Innate Training Induced by IL-4 Activation Enhances OXPHOS Driven Anti-  
2 Mycobacterial Responses

3 Mimmi L. E. Lundahl<sup>1,2\*</sup>, Morgane Mitermite<sup>3a</sup>, Dylan G. Ryan<sup>4,5a</sup>, Niamh C. Williams<sup>4</sup>, Ming Yang<sup>5</sup>, Filipa  
4 Lebre<sup>1</sup>, Aoife L. Gorman<sup>1</sup>, Bojan Stojkovic<sup>3</sup>, Christian Frezza<sup>5</sup>, Eoin M. Scanlan<sup>2</sup>, Luke A. J. O'Neill<sup>4</sup>,  
5 Stephen V. Gordon<sup>3</sup>, Ed C. Lavelle<sup>1,6\*</sup>.

6 <sup>1</sup>School of Biochemistry and Immunology, Adjuvant Research Group, Trinity Biomedical Sciences Institute, Trinity  
7 College Dublin, Dublin, D02 R590 Ireland.

8 <sup>2</sup>School of Chemistry, Scanlan Research Group, Trinity Biomedical Sciences Institute, Trinity College Dublin,  
9 Dublin, D02 R590 Ireland.

10 <sup>3</sup>School of Veterinary Medicine, UCD Veterinary Sciences Centre, University College Dublin, Dublin, Ireland.

11 <sup>4</sup>School of Biochemistry and Immunology, Inflammation Research Group, Trinity Biomedical Sciences Institute,  
12 Trinity College Dublin, D02 R590 Ireland.

13 <sup>5</sup>Hutchison/MRC Research centre, MRC Cancer Unit, University of Cambridge, Cambridge, CB2 0XZ UK.

14 <sup>6</sup>Lead contact

15 <sup>a</sup>Share joint second authorship

16 \*Correspondence: [lavellee@tcd.ie](mailto:lavellee@tcd.ie) and [lundahlm@tcd.ie](mailto:lundahlm@tcd.ie)

17

18 **Abstract**

19 Macrophages are key innate immune cells for determining the outcome of *Mycobacterium*  
20 *tuberculosis* infection. Polarization with IFN $\gamma$  and LPS into the “classically activated” M1 macrophage  
21 enhances pro-inflammatory and microbicidal responses, important for eradicating the bacterium. By  
22 contrast, “alternatively activated” M2 macrophages, polarized with IL-4, oppose bactericidal  
23 mechanisms and allow mycobacterial growth. These activation states are accompanied by distinct  
24 metabolic profiles, where M1 macrophages favor near exclusive use of glycolysis, whereas M2  
25 macrophages up-regulate oxidative phosphorylation (OXPHOS). Here we demonstrate that activation  
26 with IL-4 counterintuitively induces protective innate memory against mycobacterial challenge. This  
27 was associated with enhanced pro-inflammatory cytokine responses and killing capacity. Moreover,  
28 despite this switch towards a phenotype that is more akin to classical activation, IL-4 trained  
29 macrophages do not demonstrate M1-typical metabolism, instead retaining heightened use of  
30 OXPHOS. Moreover, inhibition of OXPHOS with oligomycin, 2-deoxy glucose or BPTES all impeded  
31 heightened pro-inflammatory cytokine responses from IL-4 trained macrophages. Lastly, this work  
32 identifies that IL-10 negatively regulates protective IL-4 training, impeding pro-inflammatory and  
33 bactericidal mechanisms. In summary, this work provides new and unexpected insight into alternative  
34 macrophage activation states in the context of mycobacterial infection.

35

## 36 Introduction

37 *Mycobacterium tuberculosis*, the causative agent of tuberculosis (TB), has arguably caused the most  
38 deaths of any pathogen in human history. *M. tuberculosis* continues to be the cause of more than a  
39 million deaths annually: in 2018, 10 million people were newly diagnosed with active TB and 1.4  
40 million died from the disease (WHO, 2019). The only currently licensed TB vaccine, Bacille Calmette-  
41 Guérin (BCG), was developed a century ago and although it protects children against disseminated  
42 disease, it fails to protect adults from pulmonary infection (Ryndak & Laal, 2019). The lack of an  
43 efficient vaccine, and growing antibiotic resistance, means that new ways of combatting TB are  
44 urgently needed (Choreño-Parra, Weinstein, Yunis, Zúñiga, & Hernández-Pando, 2020).

45 Macrophages are key host innate immune cells for controlling *M. tuberculosis* infection  
46 (Cohen et al., 2018). A significant feature of macrophages is dynamic plasticity, expressed by their  
47 ability to polarize towards distinct activation states (M. L. E. Lundahl, Scanlan, & Lavelle, 2017; Sica,  
48 Erreni, Allavena, & Porta, 2015). Activation with interferon gamma (IFN $\gamma$ ) together with  
49 lipopolysaccharides (LPS) yields the bactericidal and pro-inflammatory “classically activated” or M1  
50 macrophages (Ferrante & Leibovich, 2012; Sica et al., 2015), whereas activation with the type 2 and  
51 regulatory cytokines, interleukin (IL)-4, IL-13, IL-10 and transforming growth factor (TGF) $\beta$ , results in  
52 “alternatively activated” M2 macrophages, which enhance allergic responses, resolve inflammation  
53 and induce tissue remodeling (Bystrom et al., 2008; Mantovani et al., 2004). Another key difference  
54 between these activation states are their metabolic profiles: whereas classically activated  
55 macrophages switch to near exclusive use of glycolysis to drive their ATP production, alternatively  
56 activated macrophages instead upregulate their oxidative phosphorylation (OXPHOS) machinery (Van  
57 den Bossche et al., 2016; Van den Bossche, O’Neill, & Menon, 2017).

58 Whilst classifying macrophages in this manner is a simplification – the reality is a broad  
59 spectrum of various differentiation states that is continuously regulated by a myriad of signals (Sica et  
60 al., 2015) – it is nevertheless considered that for a host to control TB infection, classical macrophage  
61 activation is vital (Jouanguy et al., 1999; Philips & Ernst, 2012). Furthermore, a macrophage metabolic  
62 shift to glycolysis is crucial for effective killing and thus overall control of TB infection (Gleeson et al.,  
63 2016; Huang, Nazarova, Tan, Liu, & Russell, 2018). By contrast, alternatively activated macrophages  
64 directly oppose bactericidal responses, which has been demonstrated to lead to enhanced bacterial  
65 burden and TB pathology (Moreira-Teixeira et al., 2016; Orecchioni, Ghosheh, Pramod, & Ley, 2019;  
66 Shi, Jiang, Bushkin, Subbian, & Tyagi, 2019). Due in large part to the established ability of classically  
67 activated macrophages to kill *M. tuberculosis*, inducing Th1 immunity is a key aim for TB vaccine  
68 development (Abebe, 2012; Andersen & Kaufmann, 2014; Ottenhoff et al., 2010). Apart from targeting  
69 adaptive immune memory, another promising approach has emerged in recent years: bolstering

70 innate immune killing capacity by the induction of innate training (Khader et al., 2019; Moorlag et al.,  
71 2020).

72 Innate training is regarded as a form of immunological memory. It is a phenomenon where a  
73 primary challenge, such as a vaccination or an infection, induces epigenetic changes in innate immune  
74 cells, which alters their responses following a secondary challenge (Arts et al., 2018; Saeed et al., 2014;  
75 van der Meer, Joosten, Riksen, & Netea, 2015). Unlike adaptive immune memory, innate training is  
76 non-specific, i.e. the secondary challenge does not need to be related to the primary challenge. For  
77 instance, BCG vaccination has been demonstrated to protect severe combined immunodeficiency  
78 (SCID) mice from lethal *Candida albicans* infection; reducing fungal burden and significantly improving  
79 survival (Kleinnijenhuis et al., 2012). This ability of the BCG vaccine to train innate immunity is now  
80 believed to be a core mechanism by which it induces its protection against *M. tuberculosis*. Apart from  
81 the BCG vaccine, it has been demonstrated that other organisms and compounds can induce innate  
82 training, such as  $\beta$ -glucan (van der Meer et al., 2015) which induced protective innate training against  
83 virulent *M. tuberculosis*, as shown by enhanced mouse survival following *in vivo* infection, and  
84 enhanced human monocyte pro-inflammatory cytokine secretion following *ex vivo* infection (Moorlag  
85 et al., 2020).

86 Conversely, there is a risk that certain immune challenges could lead to innate immune re-  
87 programming that hinders protective immune responses. For instance, recent reports have  
88 demonstrated how virulent *M. tuberculosis* (N. Khan et al., 2020) and mycobacterial phenolic glycans  
89 (M. Lundahl et al., 2020) can program macrophages to attenuate bactericidal responses to subsequent  
90 mycobacterial challenge. In the current study, macrophage activation caused by former or concurrent  
91 parasitic infections is considered regarding the possibility of innate immune re-programming that  
92 hinders protective immune responses against this disease. Geographically, there is extensive overlap  
93 between tuberculosis endemic areas and the presence of helminths (Salgame, Yap, & Gause, 2013).  
94 With regard to macrophage activation and combatting tuberculosis, this is an issue as parasites induce  
95 type 2 responses, leading to alternative macrophage activation instead of classical activation and  
96 associated bactericidal responses (Chatterjee et al., 2017; X. X. Li & Zhou, 2013). Indeed, it was recently  
97 demonstrated how products of the helminth *Fasciola hepatica* can train murine macrophages for  
98 enhanced secretion of the anti-inflammatory cytokine IL-10 (Quinn et al., 2019).

99 Unexpectedly, our data indicates that murine macrophage activation with IL-4 and IL-13  
100 induces innate training that enhances pro-inflammatory and bactericidal responses against  
101 mycobacteria. Although macrophages trained with IL-4 and IL-13 resemble classically activated  
102 macrophages, we identify that they do not adopt their typical metabolic profile, instead retaining  
103 heightened OXPHOS activity and notably lacking a dependency on glucose and glycolysis. Lastly, we

104 identify IL-10 as a negative regulator of this innate training response, which may have obscured  
105 previous identification of this macrophage phenotype.

106

## 107 **Results**

### 108 **Prior Alternative Activation Enhances Mycobacterial Killing**

109 Macrophages are key immune cells for combatting *M. tuberculosis*. Upon infection, alveolar  
110 macrophages serve as the initial hosts of the intracellular bacterium (Cohen et al., 2018) and  
111 bactericidal responses of recruited monocyte-derived macrophages (MDM) are crucial for control and  
112 killing of *M. tuberculosis* (Huang et al., 2018). Overall, it has been highlighted that an early Th1 driven  
113 immune response is key to early eradication of *M. tuberculosis*, where classical activation of  
114 macrophages results in effective bactericidal action. However, a complicating factor is the occurrence  
115 of concurrent parasitic disease, which instead drives Th2 immunity and alternative macrophage  
116 activation, which in turn has been demonstrated to enhance TB pathology (Moreira-Teixeira et al.,  
117 2016; Orecchioni et al., 2019). In this context, we sought to investigate how type 2 responses may  
118 induce innate memory, and how such memory could affect macrophage bactericidal properties.

119 To investigate the effect of IL-4 and IL-13 on macrophage acute and innate memory responses,  
120 an *in vitro* model of BCG infection was used. Murine bone marrow-derived macrophages (BMDMs)  
121 were stimulated with IL-4 and IL-13 (M(4/13)) on Day -1, followed by infection with BCG Denmark on  
122 either Day 0 or Day 6 (**Figure 1A**). On either day, the macrophages were exposed to roughly 30 bacteria  
123 per cell and after three hours extracellular bacteria were removed by washing and internalized  
124 bacteria were measured by colony forming units (CFUs), resulting in a multiplicity of infection (MOI)  
125 between one and four, depending on differences in uptake (**Figure 1B**). Internalized bacteria were  
126 measured by CFU (**Figure S1A**) at 27- and 51 hours post infection to determine killing capacity (**Figure**  
127 **1C**).

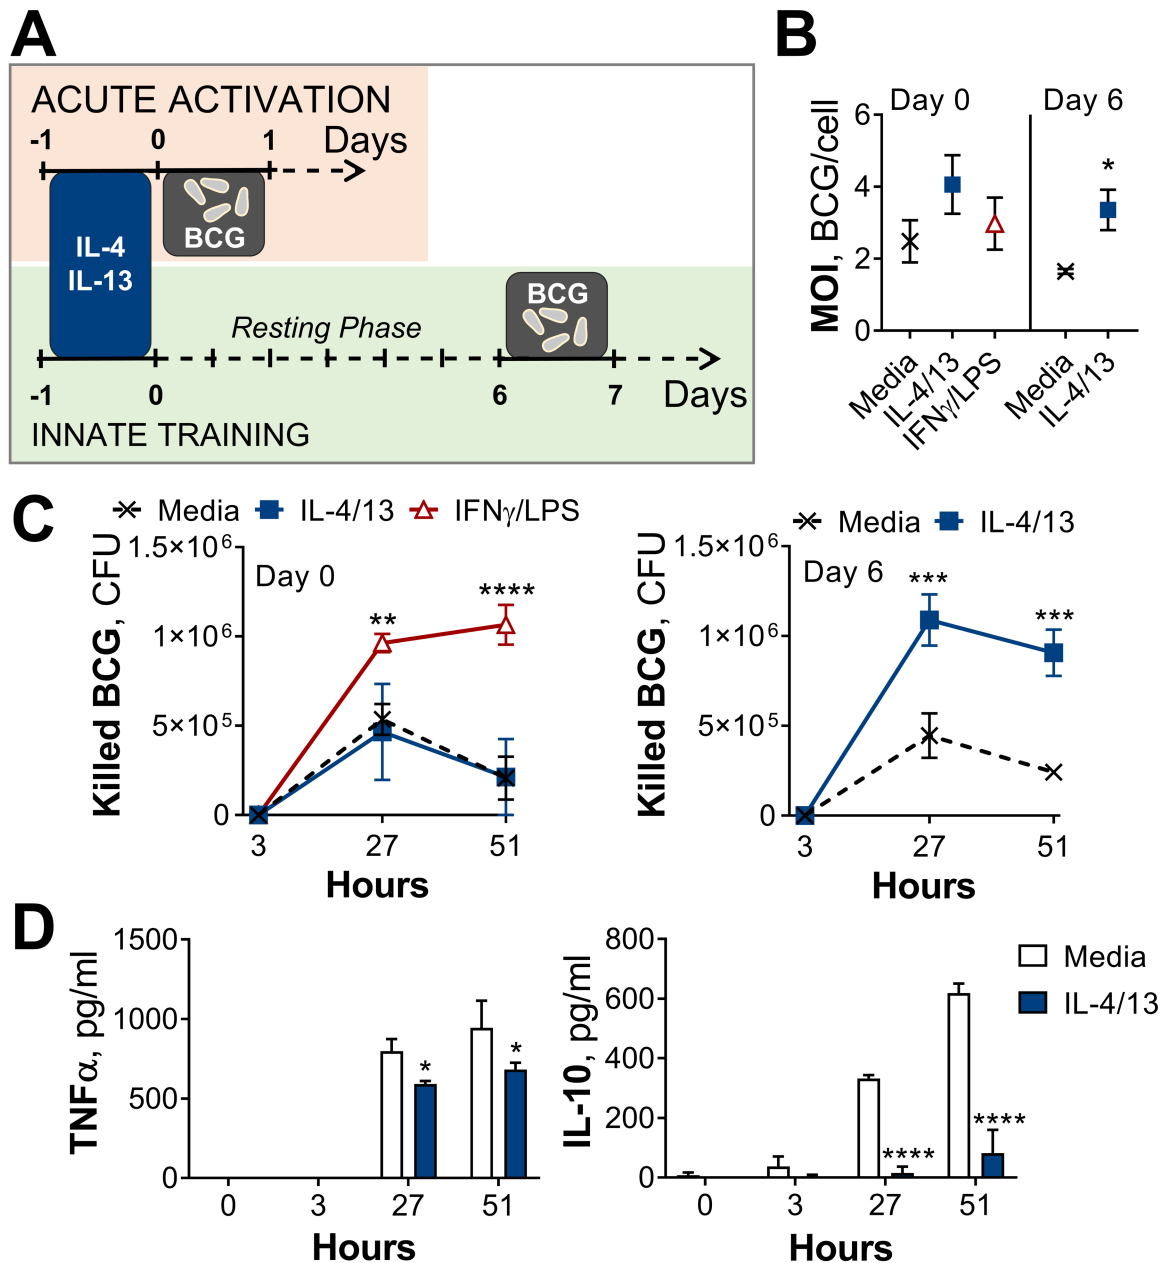

128

129 **Figure 1. Training with IL-4 and IL-13 enhances BMDM mycobacterial killing capacity.**

130 (A) Schematic of protocol for BCG infection following acute activation (Day 0) or training (Day 6) with IL-4 and  
 131 IL-13. (B-C) BCG Denmark MOI (B) and killing after h as indicated (C), measured by CFU per 0.5 × 10<sup>6</sup> BMDMs on  
 132 Day 0 or Day 6. BMDMs were incubated with media, IL-4 with IL-13 or IFN $\gamma$  with LPS for 24 h on Day -1. (D)  
 133 Secretion of indicated cytokines from BMDMs treated as in (C), standardized to 0.5 × 10<sup>6</sup> BMDMs. (B-D)  
 134 Representative results (n = 2) showing mean ± SEM (B-C) or ± STD (D) and analyzed by student's t-test (B) or  
 135 multiple t-tests, with Holm-Sidak correction (C-D), compared with media control. \* p ≤ 0.05, \*\* p ≤ 0.01, \*\*\*\* p  
 136 ≤ 0.0001.

137

138 Mycobacterial killing was compared to naïve BMDMs incubated with media on day -1 (media control,  
 139 M(-)) on both Days 0 and 6, and BMDMs classically activated with IFN $\gamma$  and LPS (M(IFN $\gamma$ /LPS)) on Day  
 140 0. M(IFN $\gamma$ /LPS) could not be investigated on Day 6 due to reduced viability. On Day 0, M(IFN $\gamma$ /LPS)  
 141 displayed significantly enhanced mycobacterial killing at 27- and 51-hours post infection, whereas

142 M(4/13) displayed comparable killing capacity to naïve M(-) (**Figure 1C**). Secretion of TNF $\alpha$  and IL-10  
143 were also measured at 3-, 27- and 51 hours post infection on Day 0 (**Figure S1B**) and Day 6 (**Figure**  
144 **1D**). These cytokines were chosen as TNF $\alpha$  is critical in the early host response against *M. tuberculosis*  
145 (Bourigault et al., 2013; Keane et al., 2001), while IL-10 can prevent phagolysosome maturation in  
146 human macrophages (O’Leary, O’Sullivan, & Keane, 2011) and promote disease progression in mice  
147 (Beamer et al., 2008). Following BCG infection on Day 0 (**Figure S1B**), IL-10 was not detectable and  
148 bactericidal M(IFN $\gamma$ /LPS) secreted TNF $\alpha$ . Consistent with previous work, activation with IL-4 and IL-13  
149 on the other hand did not enhance BCG killing nor induce inflammatory cytokine secretion.

150 By contrast, on Day 6 (innate training responses), M(4/13) exhibited both heightened  
151 mycobacterial uptake (**Figure 1B**) and significantly greater killing capacity compared with untrained  
152 M(-), both at 27- and 51 hours post infection (**Figures 1C and S1A**). Furthermore, this was accompanied  
153 by a near complete abrogation of IL-10 secretion, along with a minor decrease of TNF $\alpha$  compared with  
154 M(-) (**Figure 1D**), displaying an overall shift towards a more pro-inflammatory response profile. To  
155 investigate the change in phenotype of M(4/13) between the two days tested, a more detailed  
156 characterization was carried out.

157

#### 158 **Innate Training with IL-4 and IL-13 Promotes Pro-Inflammatory Responses**

159 The current dogma suggests that classical (M1) macrophage activation induces upregulation of  
160 antigen presentation, enhanced secretion of pro-inflammatory cytokines including interleukin (IL)-1 $\beta$ ,  
161 IL-6 and TNF $\alpha$ , as well as the production of reactive oxygen and nitrogen species (ROS and RNS  
162 respectively) (Bystrom et al., 2008; Sica et al., 2015). By contrast, alternatively activated macrophages  
163 (M2) dampen inflammation, promote angiogenesis and scavenge debris (Gordon & Martinez, 2010;  
164 Sica et al., 2015). These macrophages are identified by their upregulation of chitinase-like 3-1 (Chil3),  
165 found in inflammatory zone-1 (Fizz1, Retnla) and arginase (Arg1) (Gabrilovich, Ostrand-Rosenberg, &  
166 Bronte, 2012; Murray & Wynn, 2011), as well as surface expression of lectins, such as the macrophage  
167 mannose receptor (MR, CD206) (Brown & Crocker, 2016). Flow cytometry and qPCR analysis of  
168 M(IFN $\gamma$ /LPS) and M(4/13), compared with inactivated M(-), showed that these activation phenotypes  
169 tallied with the literature: M(IFN $\gamma$ /LPS) had elevated expression of CD80, major histocompatibility  
170 complex class II (MHC II) and inducible nitric oxide synthase (iNOS, *Nos2*) – responsible for production  
171 of the reactive nitrogen species, nitric oxide (NO) – whereas M(4/13) exhibited heightened expression  
172 of CD206, MHC II, *Arg1*, *Chil3* and *Retnla* (**Figures S2A-C**).

173 To examine their respective cytokine response profiles, M(IFN $\gamma$ /LPS) and M(4/13) were  
174 stimulated with killed *M. tuberculosis* strain H37Rv (hereafter referred to as Mtb) or the TLR1/2 ligand  
175 tripalmitoyl-S-glycerol-cysteine (PAM3CSK4) on either Day 0 or Day 6. Acutely activated M(IFN $\gamma$ /LPS)  
176 demonstrated elevated secretion of TNF $\alpha$ , IL-6 and IL-10 in response to Mtb (**Figure S2D**) and elevated

177 TNF $\alpha$  and IL-6 in response to PAM3CSK4 (**Figure S3A**), compared with M(-). By contrast, M(4/13) had  
178 attenuated secretion of each cytokine compared with M(-), following either Mtb or PAM3CSK4  
179 stimulation. However, on Day 6 (innate memory responses), both M(IFN $\gamma$ /LPS) and M(4/13) secreted  
180 greater pro-inflammatory TNF $\alpha$  and reduced anti-inflammatory IL-10 in response to Mtb (**Figure 2A**),  
181 and secreted elevated TNF $\alpha$  following PAM3CSK4 stimulation (**Figure S3B**). M(4/13) additionally  
182 exhibited increased IL-6 secretion in response to both stimuli. As with the BCG infection, M(IL-4/13)  
183 responses changed markedly between Day 0 and Day 6, shifting towards a pro-inflammatory response  
184 profile which was similar to classically activated macrophages.

185

186

187

188

189

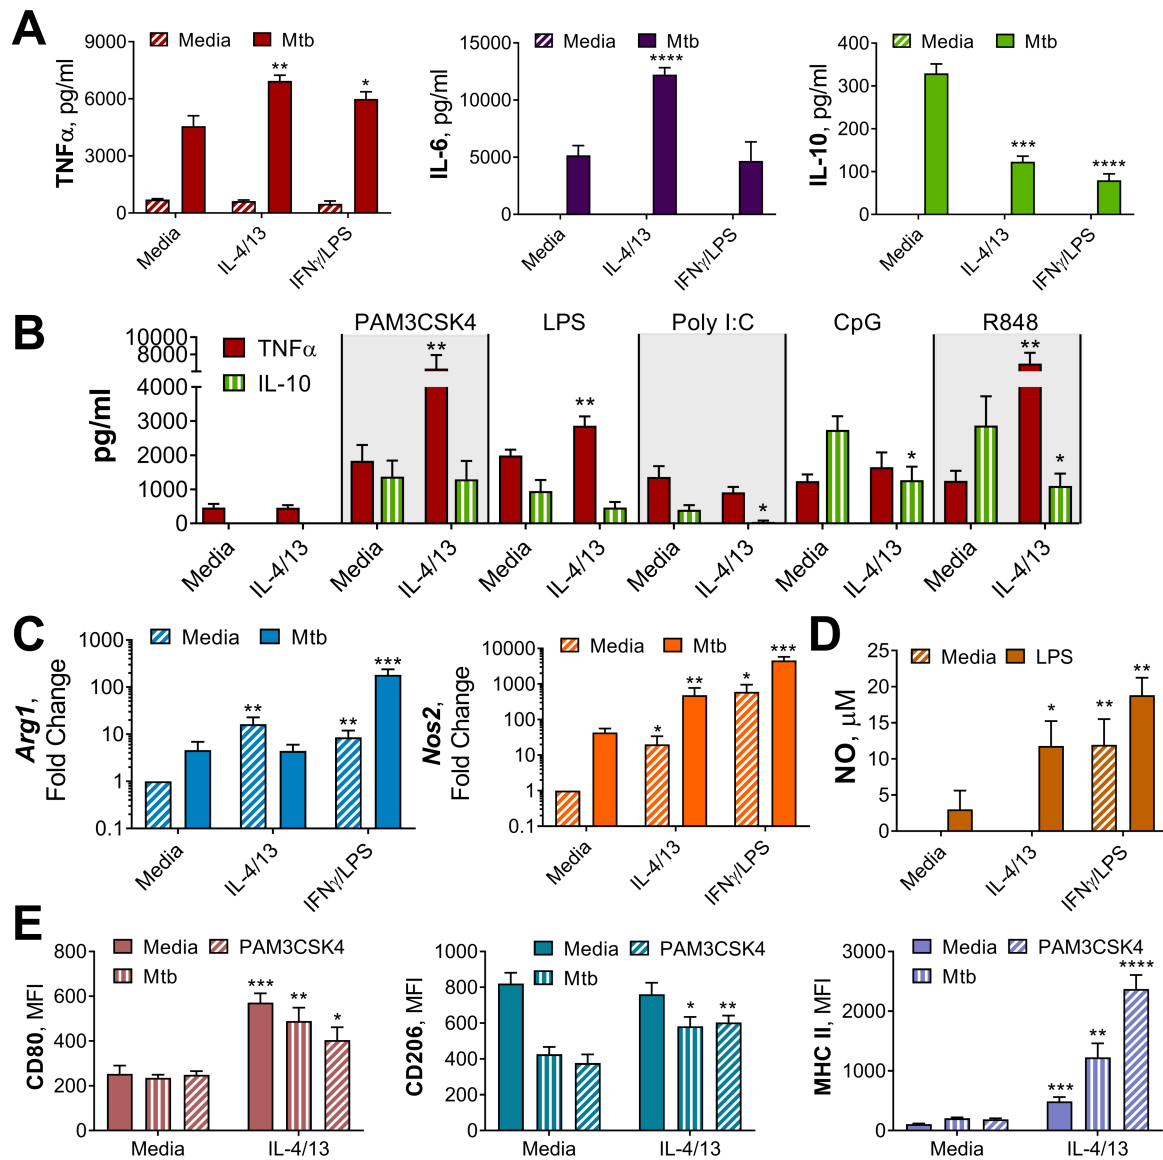

190

191 **Figure 2. Innate training of BMDMs with IL-4 and IL-13 enhances pro-inflammatory responses.**

192 (A-B) Cytokine secretion following BMDM 24 h incubation with irradiated *M. tuberculosis* (Mtb) (A), TLR agonists  
 193 (B) or media on Day 6 as indicated. BMDMs were previously incubated with media, IL-4 with IL-13 or IFN $\gamma$  with  
 194 LPS on Day -1 for 24 h (n = 3). (C) qPCR of indicated mRNA in BMDMs treated as in (A), standardized to BMDMs  
 195 incubated with media Day -1 and Day 6 (n = 4). (D) Nitric oxide (NO) secretion from BMDMs treated as in (B) (n  
 196 = 3). (E) Expression of CD80, CD206 and MHC II (gating strategy Figure S2A) on BMDMs treated as in (A-B) (n =  
 197 3). Mean  $\pm$  SD are shown and analyzed by student's t-test, compared with media control. \* p  $\leq$  0.05, \*\* p  $\leq$  0.01,  
 198 \*\*\* p  $\leq$  0.001, \*\*\*\* p  $\leq$  0.0001.

199

200 To consider whether the shift in M(4/13) to a pro-inflammatory cytokine profile was dependent on  
 201 epigenetic changes, the DNA methylation inhibitor 5'-deoxy-5'-(methylthio)adenosine (MTA), was  
 202 employed. This inhibitor has been demonstrated to impede training by BCG (Kleinnijenhuis et al.,  
 203 2012) and  $\beta$ -glucan (Quintin et al., 2012) – which promote pro-inflammatory responses – as well as  
 204 training induced by helminth *Fasciola hepatica* total extract (Quinn et al., 2019), which enhances anti-  
 205 inflammatory responses such as IL-10 and IL-1Ra secretion. The addition of MTA prior to activation



206 with IL-4 and IL-13 on day -1 reduced TNF $\alpha$ , IL-6 and IL-10 secretion induced by either Mtb or  
207 PAM3CSK4 on Day 6 (**Figure S3C**), resulting in a profile reminiscent of acutely activated M(4/13)  
208 (**Figure S2D**). By contrast, inhibition of DNA methylation in M(-) resulted in comparable or even  
209 increased cytokine secretion. This suggested that DNA methylation following IL-4 and IL-13 activation  
210 contributed to the innate training and subsequent enhancement of pro-inflammatory responses.

211 Next, we addressed whether the shift towards pro-inflammatory responses was applicable to  
212 other stimuli, trained M(4/13) were incubated with various Toll-like receptor (TLR) agonists on Day 6  
213 (**Figure 2B**). Incubation of cells with ligands for TLR1/2, TLR4, TLR7/8 or TLR 9 resulted in an increase  
214 of TNF $\alpha$  production, reduced IL-10 secretion or both. This demonstrated that prior activation with IL-  
215 4 and IL-13 caused a subsequent shift towards a pro-inflammatory response profile in response to a  
216 range of pathogen-related agonists.

217 Having considered cytokine responses, the expression of *Arg1* and *Nos2* and the secretion of  
218 NO were next addressed. In mice, the induction of iNOS is important for bactericidal NO production  
219 and subsequent killing of *M. tuberculosis* (Flynn et al., 1993; Pasula, Martin, Kesavalu, Abdalla, &  
220 Britigan, 2017). In turn, *Arg1* directly impedes the bactericidal function of iNOS by sequestering the  
221 amino acid, arginine, which each enzyme uses to make their respective products: ornithine and NO.  
222 Subsequently, in the murine model of TB infection, *Arg1* has been linked with increased bacterial  
223 burden and pathology (Moreira-Teixeira et al., 2016).

224 Without a secondary stimulation on Day 6, M(4/13) and M(IFN $\gamma$ /LPS) displayed higher levels  
225 of *Arg1* and *Nos2* expression, compared with BMDMs incubated in media alone (**Figure 2C**), and  
226 M(IFN $\gamma$ /LPS) exhibited markedly higher expression of *Nos2* compared with M(4/13). Following  
227 stimulation with Mtb (**Figure 3C**) or PAM3CSK4 (**Figure S3D**) M(IFN $\gamma$ /LPS) exhibited elevated  
228 expression of both *Arg1* and *Nos2* compared with untrained M(-), however the trained M(4/13)  
229 exhibited equivalent expression of *Arg1*, but with enhanced *Nos2*, demonstrating a further shift  
230 towards an M1 profile. An increase in NO production could not be detected following Mtb stimulation;  
231 however, following LPS stimulation, both M(4/13) and M(IFN $\gamma$ /LPS) secreted greater levels of NO  
232 compared to M(-) (**Figure 2D**).

233 Other M1 and M2 markers were analyzed by flow cytometry, following incubation with media,  
234 Mtb or PAM3CSK4 on Day 6 (**Figure 2E**). Without secondary stimulation, M(4/13) exhibited an M1-  
235 typical profile: heightened expression of CD80 and MHC II, whilst CD206 expression was comparable  
236 to M(-). Following secondary stimulation with either Mtb or PAM3CSK4, M(4/13) CD80, CD206 and  
237 MHC II expression was significantly greater compared with M(-). Having observed a change in  
238 activation markers, cytokine induction and bactericidal capacity in M(4/13) between Days 0 and 6, the  
239 next question was whether there was a corresponding shift in glycolytic metabolism.

240

241 **BMDMs Trained with IL-4 and IL-13 Retain OXPHOS Metabolism**

242 The increased energy and biosynthetic precursor demand induced by various macrophage activation  
243 states are met in distinct ways. Consistent with previous studies, M(4/13) on Day 1 displayed both an  
244 increase of oxygen consumption rate (OCR) – indicative of mitochondrial OXPHOS activity – and  
245 extracellular acidification rate (ECAR) – an indirect measurement of lactic acid secretion and thus  
246 indicative of glycolysis (**Figure 3A**). This demonstrated how alternative activation is intrinsically linked  
247 with enhanced mitochondrial OXPHOS activity, via the tricarboxylic acid (TCA) cycle (Van den Bossche  
248 et al., 2016; Wang et al., 2018). The TCA cycle is in turn driven by glycolysis, glutaminolysis and fatty  
249 acid oxidation (Viola, Munari, Sánchez-Rodríguez, Scolaro, & Castegna, 2019). By contrast, acutely  
250 activated M(IFN $\gamma$ /LPS) displayed an increase in ECAR and reduced OCR (**Figure 3A**), which was  
251 indicative of augmented glycolysis to meet the increased need for ATP, whilst ATP synthesis via  
252 OXPHOS is hindered (Liu et al., 2016). This glycolytic shift is critical for pro-inflammatory responses  
253 induced by classically activated macrophages and moreover results in mitochondrial dysfunction (Van  
254 den Bossche et al., 2016).

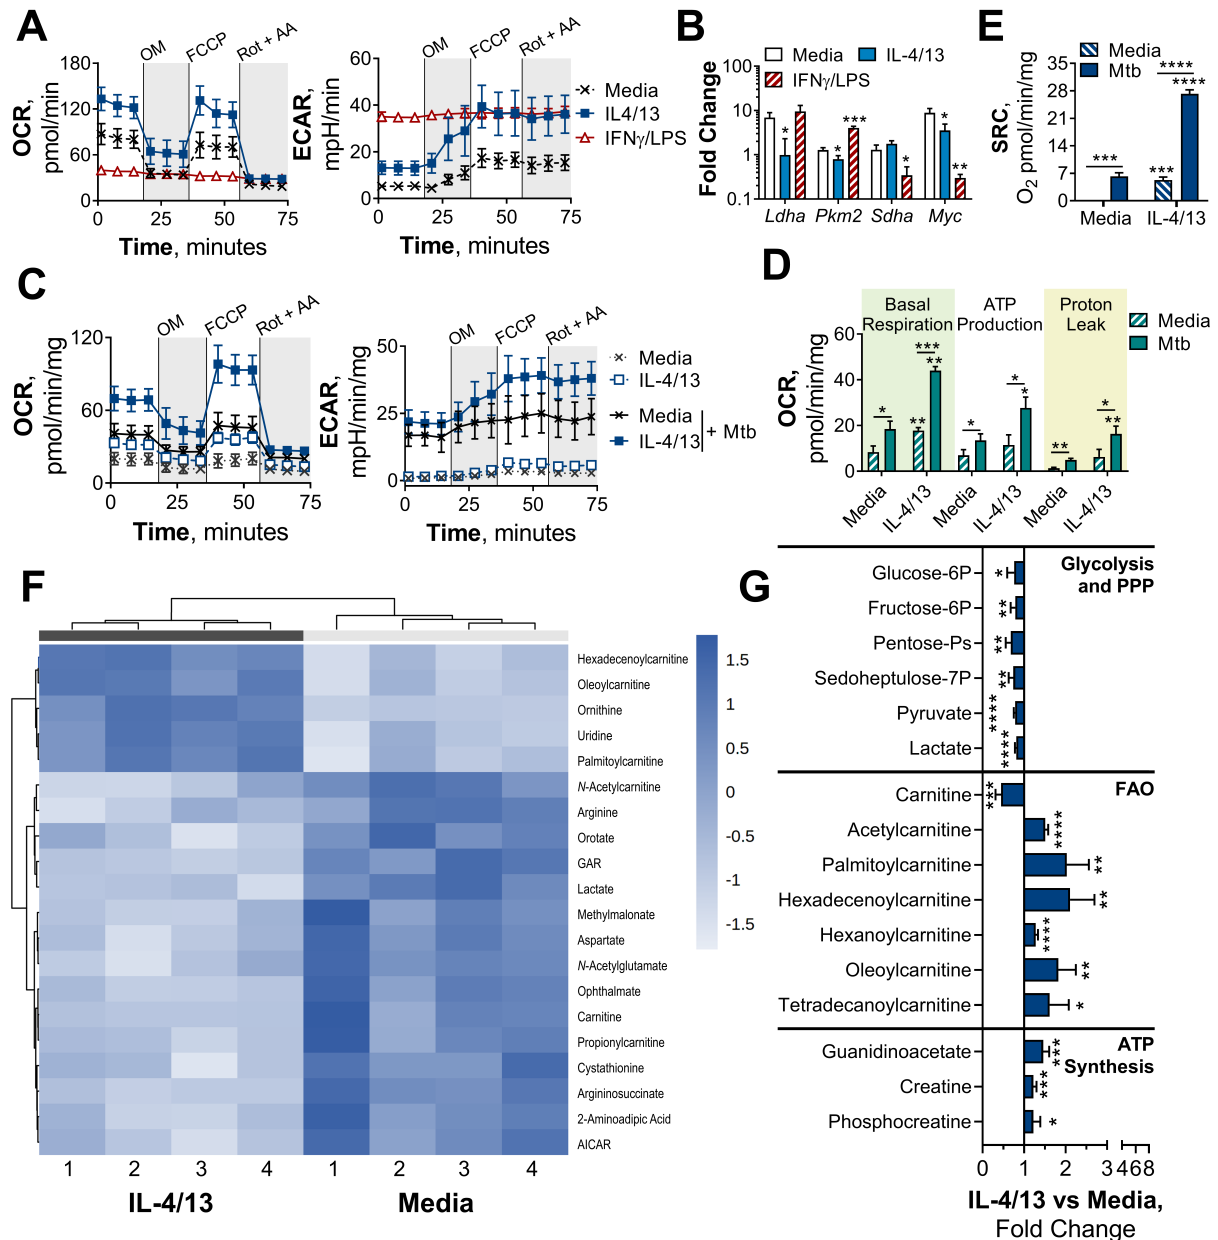

255

256 **Figure 3. BMDMs trained with IL-4 and IL-13 retain M2-typical metabolism upon mycobacterial**  
 257 **challenge.**

258 (A) Extracellular flux analysis of BMDMs, following 24 h incubation with IL-4 and IL-13, IFN $\gamma$  and LPS or media (n  
 259 = 2). (B) qPCR of indicated mRNA in BMDMs following incubation with media, IL-4 with IL-13 or IFN $\gamma$  with LPS for  
 260 24 h on Day -1 and stimulated with irradiated *M. tuberculosis* (Mtb) for 6 h (*Pkm2*) or 24 h (*Ldha*, *Sdha* and *Myc*),  
 261 standardized to BMDMs given media on Day -1 and Day 6 (n = 3). (C-E) Extracellular flux analysis (C), basal  
 262 respiration, ATP production, proton leak (D) and spare respiratory capacity (SRC) (E) of BMDMs treated as in (B),  
 263 with incubation with media or IL-4 with IL-13 on Day -1 and stimulation with media or Mtb for 24 h on Day 6 (n  
 264 = 3). (F-G) Metabolites from BMDMs treated as in (B), incubated with media or IL-4 with IL-13 on Day -1 and  
 265 stimulation with Mtb for 24 h on Day 6 (n = 4). MetaboAnalyst generated heatmap representing hierarchical  
 266 clustering of the top 20 most up/down regulated metabolites (F). Fold change compared with media control (=1)  
 267 (G). Mean  $\pm$  SD are shown and analyzed by student's t-test. \* p  $\leq$  0.05, \*\* p  $\leq$  0.01, \*\*\* p  $\leq$  0.001, \*\*\*\* p  $\leq$   
 268 0.0001. Abbreviations: AA, antimycin-A; AICAR, aminoimidazole carboxamide ribonucleotide; ECAR,  
 269 extracellular acidification rate; FAO, fatty acid oxidation; GAR, glycinamide ribonucleotide; OCR, oxygen  
 270 consumption rate; P, phosphate; PPP, pentose phosphate pathway; Rot, rotenone.

271

272 Due to the link between glycolysis and classical activation, it is not surprising that prior work has  
273 proposed that a macrophage glycolytic shift is crucial for effective killing and thus overall control of  
274 TB infection (Gleeson et al., 2016; Huang et al., 2018). Furthermore, it has recently been proposed  
275 that *M. tuberculosis* impedes this glycolytic shift as an immune evasion strategy (Hackett et al., 2020).  
276 As we had observed that innate memory responses induced by IL-4 and IL-13 caused a switch towards  
277 a pro-inflammatory and bactericidal response profile, akin to a classically activated macrophage, it  
278 was pertinent to address whether there was an accompanying glycolytic shift. Previous work by Van  
279 den Bossche et al. has highlighted that because IL-4 activated human MDMs retain their metabolic  
280 versatility, they are able to be “re-polarized” to a classical phenotype (Van den Bossche et al., 2016).  
281 This was demonstrated by activating MDMs for 24 hours with IL-4, before the cells were washed and  
282 re-stimulated with IFN $\gamma$  and LPS for another 24 hours. MDMs previously activated with IL-4 secreted  
283 higher concentrations of TNF $\alpha$ , IL-6 and IL-12 compared with MDMs that were naïve prior to IFN $\gamma$  and  
284 LPS stimulation. This adaptive quality to re-polarize is restricted to alternatively activated  
285 macrophages, as mitochondrial dysfunction in classically activated macrophages prevents them from  
286 re-polarizing to an alternative phenotype (Van den Bossche et al., 2016). Subsequently, we next  
287 addressed whether the IL-4 trained macrophages were adopting a metabolic profile similar to a  
288 classical macrophage, or retaining their more versatile metabolic profile.

289 As with the BCG infection studies, due to the reduced viability of the M(IFN $\gamma$ /LPS) by Day 6  
290 and 7, OCR and ECAR measurements did not reach the detection limit. To compare metabolic  
291 phenotypes of the trained macrophages at these later time points, transcription profiles were  
292 therefore analyzed. Prior work has established that the transcription factor hypoxia-inducible factor-  
293 1 alpha (HIF-1 $\alpha$ ) aids the glycolytic metabolic shift following classical activation, such as upregulating  
294 the enzyme lactate dehydrogenase (LDH) (Seth et al., 2017) to increase lactic acid fermentation.  
295 Tallying with these studies, trained M(IFN $\gamma$ /LPS) on Day 7 exhibited elevated expression of LDH (*Ldha*)  
296 and pyruvate kinase isozyme M2 (PKM2, *Pkm2*) (**Figure S4A**). PKM2 has been shown to play a key role  
297 in stabilizing HIF-1 $\alpha$  and is thus a crucial determinant for glycolytic metabolism re-wiring (Palsson-  
298 McDermott et al., 2015). By contrast, on Day 7, M(4/13) displayed a similar level of LDH expression  
299 and reduced transcription of PKM2 compared with M(-).

300 On the other hand, considering OXPHOS machinery at this time point, trained M(IFN $\gamma$ /LPS)  
301 showed reduced expression of the TCA cycle enzyme succinate dehydrogenase (SDH, *Sdha*), whereas  
302 this downregulation was not present in M(4/13) (**Figure S4A**). Moreover, M(4/13) and M(IFN $\gamma$ /LPS)  
303 respectively displayed increased and decreased expression of the transcription factor  
304 myelocytomatosis viral oncogene (c-Myc, *Myc*). IL-4 and IL-13 induce c-Myc expression in alternatively

305 activated macrophages (L. Li et al., 2015; Luiz et al., 2020) and contrastingly LPS induced upregulation  
306 of HIF-1 $\alpha$  occurs in tandem with downregulation of c-Myc (Liu et al., 2016). Overall, without secondary  
307 stimulation, both trained M(IFN $\gamma$ /LPS) and M(4/13) retained transcriptional and metabolic profiles  
308 consistent with previous reports.

309       Upon secondary stimulation on Day 6 with either Mtb (**Figure 3B**) or PAM3CSK4 (**Figure S4B**),  
310 M(IFN $\gamma$ /LPS) maintained the elevated expression of *Pkm2*, accompanied by reduced transcription of  
311 *Sdha* and *Myc*. *Myc* expression was induced in untrained M(-) and M(4/13) by both secondary stimuli,  
312 although Mtb did not enhance *Myc* in M(4/13) to the same extent as M(-). Regarding glycolytic  
313 metabolism, M(4/13) displayed relatively reduced *Ldha* upon Mtb incubation (**Figure 3B**) and further  
314 maintained a similar level of *Sdha* compared with M(-). These results indicated that trained  
315 M(IFN $\gamma$ /LPS) and M(4/13) maintained their respective metabolic profiles following secondary  
316 stimulation with Mtb or PAM3CSK4. As such, these results indicated again that trained M(IFN $\gamma$ /LPS)  
317 and M(IL-4/13) maintained their respective metabolic profiles following secondary stimulation with  
318 Mtb or PAM3CSK4.

319       That trained M(4/13) retain OXPHOS metabolism was furthermore supported by Mtb  
320 stimulation increasing both OCR and ECAR in M(-) and M(4/13) (**Figure 3C**), where M(4/13) displayed  
321 significantly greater OXPHOS driven basal respiration, ATP production and concomitant proton  
322 leakage compared with M(-) (**Figure 3D**). In addition, in response to either Mtb (**Figure 3E**) or  
323 PAM3CSK4 (**Figure S4C**) there was an increase in spare respiratory capacity (SRC), further signifying  
324 that trained M(4/13) retain and even elevate OXPHOS metabolism following secondary stimulation  
325 with Mtb.

326       To further investigate the metabolic profile of trained M(IL-4/13) vs untrained (media control)  
327 stimulated with Mtb, the relative change of intracellular metabolite abundance was furthermore  
328 assessed by liquid chromatography-mass spectrometry (LC-MS, **Figures 3F-G** and **S4D-E**). This semi-  
329 targeted analysis revealed that the trained M(4/13) appeared to have increased use of the urea cycle,  
330 as shown by reduced aspartate, arginine and argininosuccinate levels along with enhanced ornithine  
331 (**Figure S4E**). Furthermore, there were reduced levels of metabolites associated with glycolysis and  
332 the pentose phosphate pathway (PPP) – such as lactate and sedoheptulose-7-phosphate – whilst  
333 metabolites involved in fatty acid oxidation (FAO) and ATP synthesis regulation were enhanced (**Figure**  
334 **3G**). In the case of FAO, reduced carnitine with enhanced carnitine-bound fatty acids (acyl carnitines)  
335 signified that fatty acids were being ferried by carnitine into the mitochondrion for FAO. FAO is  
336 upregulated during murine M2 macrophage activation and results in the production of acetyl-CoA,  
337 NADH and FADH<sub>2</sub>, which are further used to fuel the TCA cycle and downstream OXPHOS (O'Neill,  
338 Kishton, & Rathmell, 2016). Furthermore, the upregulation of creatine and phosphocreatine – as well

339 as creatine biosynthesis precursor guanidinoacetate – intimated enhanced ATP synthesis. Creatine  
340 reacts with ATP to form ADP and phosphocreatine, transporting ATP out of the mitochondrion and  
341 preventing allosteric inhibition of ATP synthesis. In the trained M(4/13) the amount of  
342 phosphocreatine per ATP was enhanced (**Figure S4F**), which indicated enhanced mitochondrial ATP  
343 synthesis and supported the hypothesis that OXPHOS was enhanced. Overall, these results suggested  
344 the trained M(4/13) were upregulating their OXPHOS activity in response to mycobacterial challenge.

345 Having observed that trained M(IL-4/IL-13) showed a distinct metabolic profile from classically  
346 activated macrophages, the roles of glycolysis and OXPHOS in driving cytokine production were next  
347 investigated with the use of inhibitors. Incubation with the glycolysis and OXPHOS inhibitor 2-deoxy  
348 glucose (2-DG) (Wang et al., 2018) prior to stimulation with Mtb (**Figure S5A**) significantly reduced  
349 TNF $\alpha$  secretion in M(IFN $\gamma$ /LPS) and M(-). 2-DG also reduced PAM3CSK4 induced TNF $\alpha$  in M(4/13) and  
350 M(IFN $\gamma$ /LPS) (**Figure S5B**) and reduced IL-6 secretion in M(4/13) following either Mtb or PAM3CSK4  
351 stimulation. Secretion of anti-inflammatory IL-10 following Mtb stimulation was also reduced by 2-DG  
352 in M(IFN $\gamma$ /LPS) and M(4/13). This demonstrated that glycolysis, OXPHOS or both were involved in  
353 driving cytokine responses to Mtb and PAM3CSK4 in all tested macrophages.

354 To further examine the role of OXPHOS, the ATP-synthase inhibitor oligomycin (OM) and the  
355 glutaminase inhibitor bis-2-(5-phenylacetamido-1,3,4-thiadiazol-2-yl)ethyl sulfide (BPTES) were used  
356 prior to secondary stimulation. The role of glutaminolysis in the trained M(IL-4/13) was of interest, as  
357 it has previously been highlighted to compensate for inhibition of glycolysis and fuel the TCA cycle  
358 during IL-4 induced macrophage activation (Wang et al., 2018). In the trained M(4/13), inhibition of  
359 either OXPHOS or glutaminolysis significantly reduced TNF $\alpha$  and IL-6 secretion following stimulation  
360 with either Mtb (**Figure 4A**) or PAM3CSK4 (**Figure S5B**), suggesting that both processes helped drive  
361 pro-inflammatory responses. By contrast, in trained M(IFN $\gamma$ /LPS), although the markedly lower level  
362 of IL-6 was further impeded by either inhibitor, the secretion of TNF $\alpha$  was unaffected, supporting  
363 M(IFN $\gamma$ /LPS) use of glycolysis to drive pro-inflammatory responses. OM and BPTES furthermore  
364 impeded IL-10 secretion from M(IFN $\gamma$ /LPS), whereas OM reduced IL-10 secretion in M(4/13) and  
365 BPTES did not (**Figure 4A**). In the case of trained M(4/13) this implicated that glutamine metabolism  
366 was selectively a driver of pro-inflammatory cytokine responses.

367

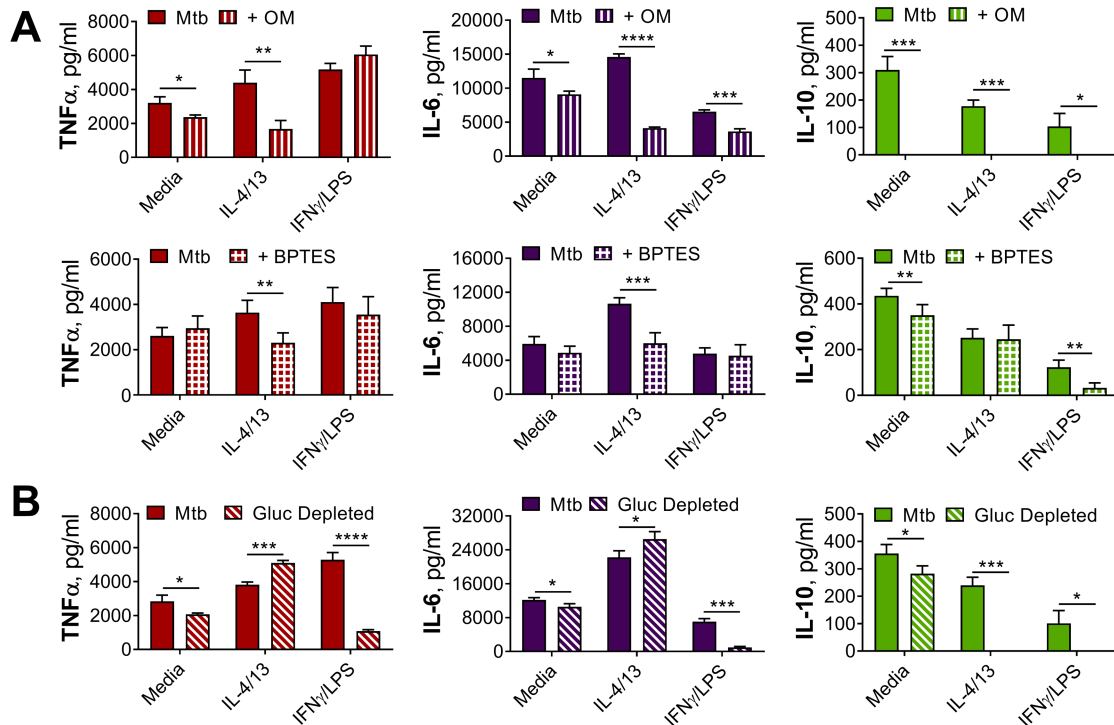

368

369 **Figure 4. OXPPOS drives inflammatory cytokine responses in IL-4/13 trained BMDMs.**

370 (A) Cytokine secretion from BMDMs following incubation with media, IL-4 with IL-13 or IFN $\gamma$  with LPS for 24 h  
 371 on Day -1 and incubation with irradiated *M. tuberculosis* (Mtb) on Day 6 for 24 h, with or without pre-incubation  
 372 (Day 6) of oligomycin (OM) or BPTES (n = 4). (B) Cytokine secretion from BMDMs treated as in (A), with or without  
 373 glucose depleted conditions between Day -1 to 7 (n = 3). Mean  $\pm$  SD are shown and analyzed by student's t-test  
 374 as indicated. \* p  $\leq$  0.05, \*\* p  $\leq$  0.01, \*\*\* p  $\leq$  0.001, \*\*\*\* p  $\leq$  0.0001.

375

376 To further cement the differences in glycolytic metabolism between trained M(IFN $\gamma$ /LPS) and M(4/13),  
 377 an experiment was carried out where BMDMs were incubated in either glucose depleted media or  
 378 regular glucose-rich media from Day-1 (Figure 4B). Whereas glucose depletion significantly reduced  
 379 the secretion of TNF $\alpha$ , IL-6 and IL-10 from M(IFN $\gamma$ /LPS) and M(-), following Mtb stimulation on Day 6,  
 380 glucose depletion did not impair pro-inflammatory cytokine secretion of M(4/13); instead the  
 381 secretion of both TNF $\alpha$  and IL-6 was elevated under these conditions, whilst levels of regulatory IL-10  
 382 were further reduced, displaying an even greater shift towards pro-inflammatory responses.  
 383 Furthermore, stimulation with PAM3CSK4 yielded similar results (Figure S5C), although IL-6 secretion  
 384 remained unaltered. This highlighted that although trained M(IFN $\gamma$ /LPS) and M(4/13) had similar  
 385 response profiles, M(4/13) appeared to retain M2-typical metabolism (Figure 5).

386

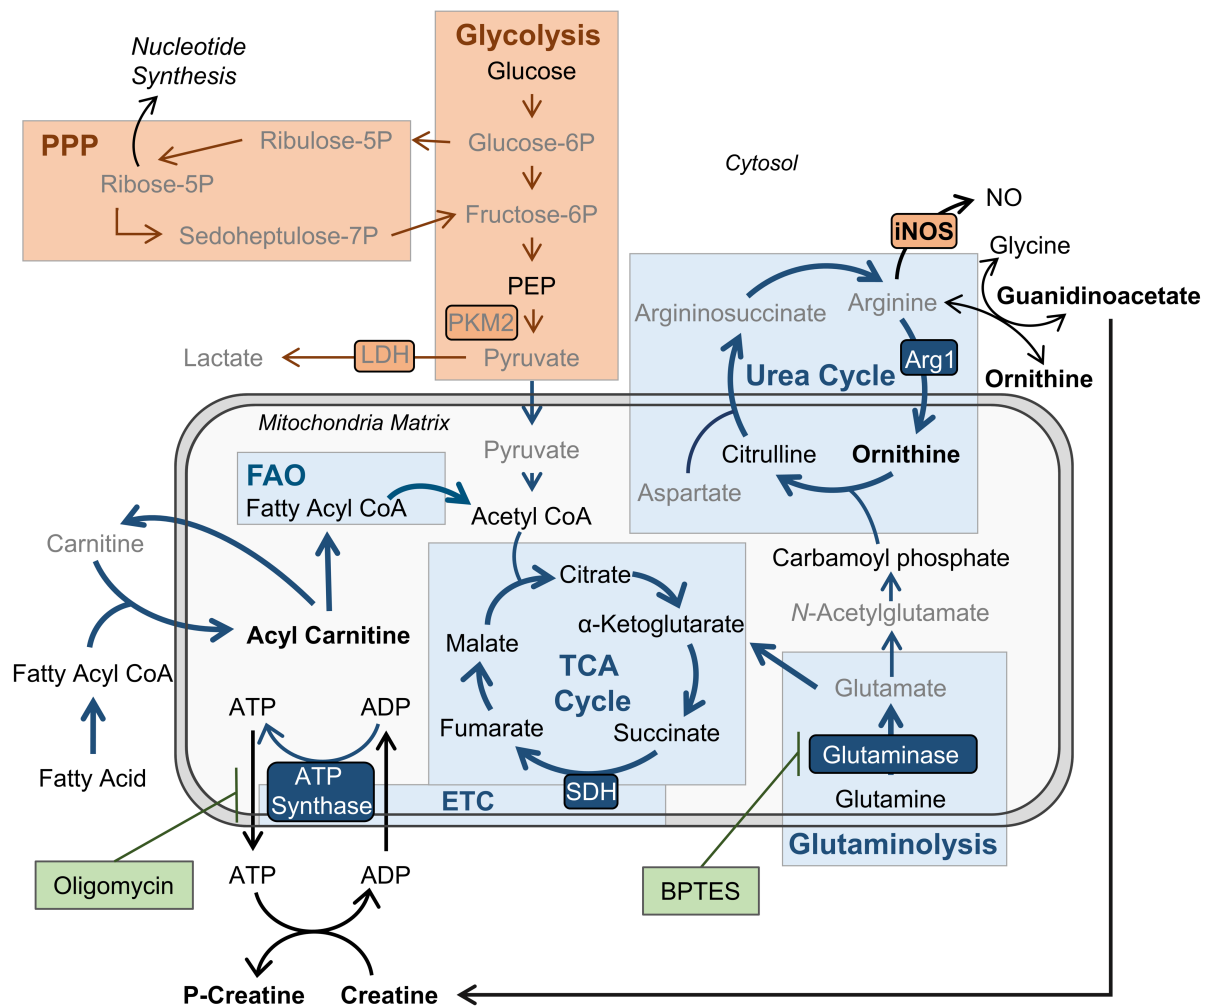

387

388 **Figure 5. BMDMs trained with IL-4 and IL-13 retain M2-typical metabolism: schematic summary of**  
 389 **results.**

390 Pathways have been simplified. Key: metabolic pathways strongly upregulated by M1/M2 macrophage  
 391 activation are highlighted by red/blue colored boxes, respectively. Inhibitors are indicated by green boxes. Arrow  
 392 width represents which pathways are implicated (thicker) or not (narrower) in trained M(4/13) following  
 393 stimulation with irradiated *M. tuberculosis* (Mtb). Metabolites (measured by LC-MS) or enzymes (measured by  
 394 qPCR) written in bold or in grey text are enhanced or reduced respectively compared with untrained  
 395 macrophages. Trained M(4/13) do not employ classical activated macrophage metabolism – aerobic glycolysis  
 396 and pentose phosphate pathway (PPP) – and instead employ alternative activated macrophage metabolism,  
 397 characterized by production of ATP through the tricarboxylic acid (TCA) cycle, coupled with the electron  
 398 transport chain (ETC) via oxidative phosphorylation (OXPHOS), as well as enhanced use of the urea cycle.  
 399 Glutaminolysis, FAO and ATP synthesis regulation are implicated. This is demonstrated by inhibitor experiments  
 400 and by changed expression of metabolites. Abbreviations: LDH, lactate dehydrogenase; NO, nitric oxide; P,  
 401 phosphate; PEP, Phosphoenolpyruvic acid; PKM2, pyruvate kinase M2; SDH, succinate dehydrogenase.  
 402

403

404

#### 404 **IL-10 Negatively Regulates IL-4 and IL-13 Induced Training**

405 A key consideration regarding alternative macrophage activation and TB infection is the influence of  
 406 concurrent parasitic disease. Along with IL-4 and IL-13, parasites can induce production of the  
 407 regulatory cytokine IL-10 (Gause, Wynn, & Allen, 2013; Roy et al., 2018), which moreover promotes



408 alternative macrophage activation (Bystrom et al., 2008; Mantovani et al., 2004). Furthermore, it has  
409 been shown that products of the helminth *F. hepatica* can train macrophages to secrete more IL-10  
410 following secondary LPS stimulation (Quinn et al., 2019). Given its association with alternative  
411 macrophage activation and parasitic infection, we next considered the potential role of IL-10 in IL-4  
412 induced macrophage innate memory responses.

413 BMDMs were activated with IL-4, IL-13 and IL-10 (M(4/13/10)) to compare how this  
414 phenotype may have differed from M(4/13). Following acute activation, M(4/13/10) had similarly  
415 elevated levels of *Arg1* as M(4/13) and a comparably minor induction of *Nos2* (**Figure 6A**). The addition  
416 of IL-10 moreover caused even greater augmentation of M2-associated *Chil3* and *Retnla* expression.  
417 Accompanying flow cytometry analysis demonstrated that both M(4/13/10) and M(4/13) exhibited  
418 reduced expression of CD80, compared with M(-), along with enhanced expression of CD206, where  
419 the M(4/13/10) had greater CD206 expression (**Figure S6A**). Regarding MHC II, only M(4/13) displayed  
420 enhanced expression compared with M(-). The similar upregulation of M2-characteristic markers  
421 indicated that M(4/13) and M(4/13/10) were two types of alternatively activated macrophages.

422

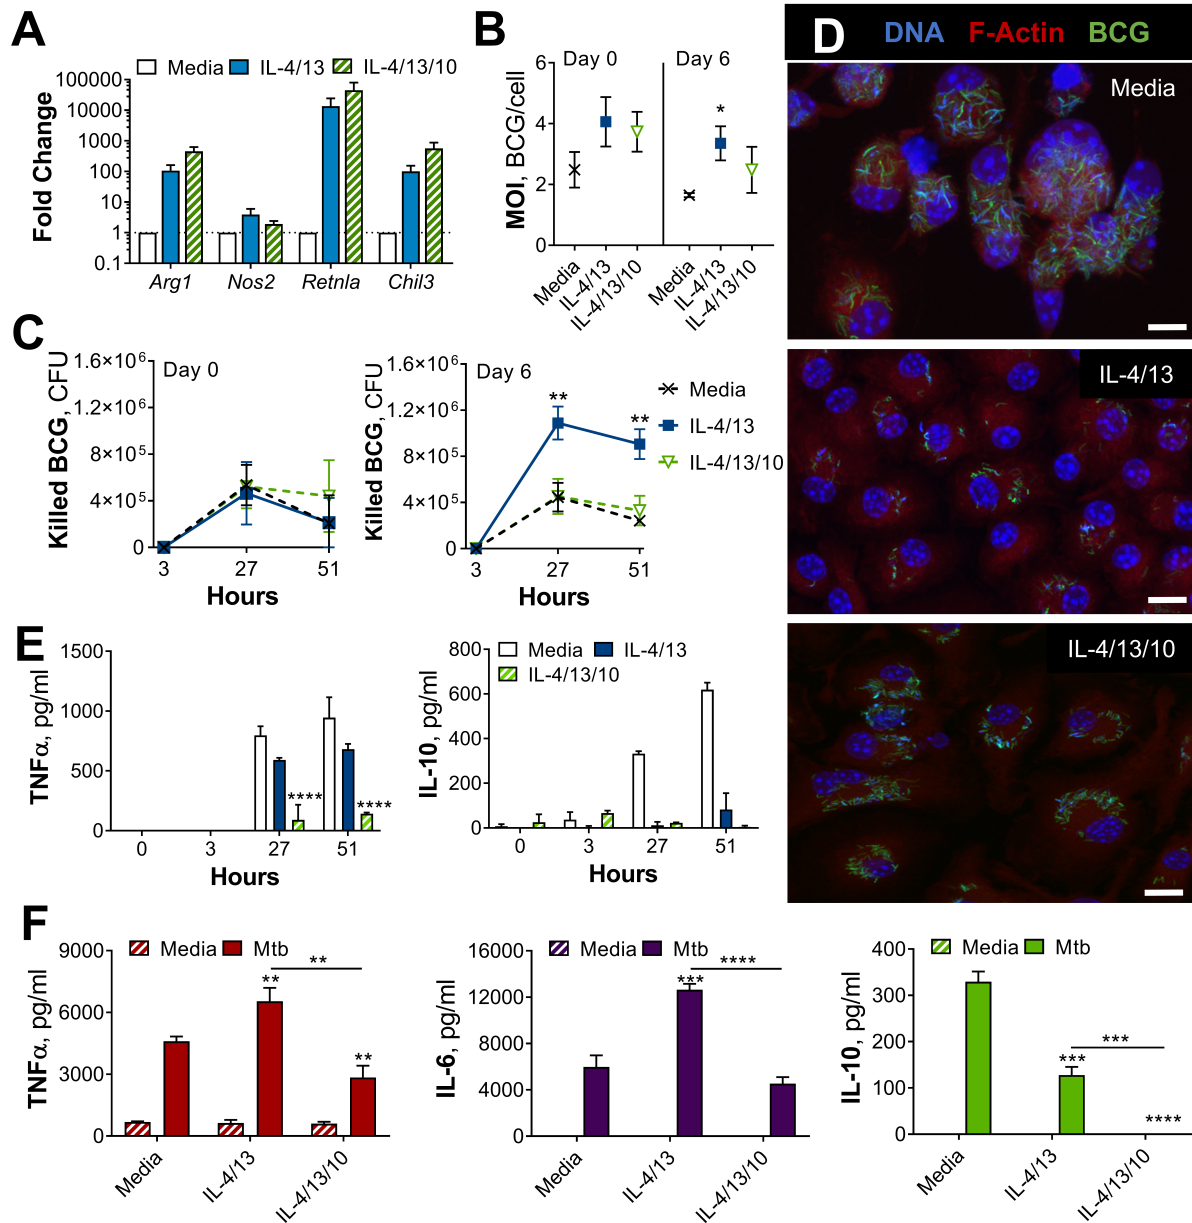

423

424 **Figure 6. IL-10 inhibits bactericidal and pro-inflammatory training induced by IL-4 and IL-13.**

425 (A) qPCR of indicated mRNA in BMDMs following 24 h incubation with media or IL-4 and IL-13, with or without  
 426 IL-10, standardized to media control (n=4). Mean ± SD are shown. (B-E) BCG Denmark MOI (B) killing after h as  
 427 indicated (C) as measured by CFU per  $0.5 \times 10^6$  BMDMs on Day 0 or Day 6. Representative images of Hoechst-  
 428 (blue), modified auramine-O- (green) and phalloidin (red)-stained BMDMs were taken on Day 6, 27 h after BCG  
 429 incubation (D). Cytokine secretion on Day 6, at h indicated (E). BMDMs were previously incubated with media  
 430 or IL-4 and IL-13, with or without IL-10, for 24 h on Day -1. (B-C, E) representative results (n = 2) are shown as  
 431 mean ± SD (B, E) or SEM (C) and analyzed by student's t-test compared with media (B) or multiple t-tests, with  
 432 Holm-Sidak correction, comparing with or without IL-10 (C, E). (F) Cytokine secretion following BMDM incubation  
 433 with media or IL-4 and IL-13, with or without IL-10, for 24 h on Day -1 and incubated for 24 h with media or  
 434 irradiated *M. tuberculosis* (Mtb) on Day 6. Mean ± SD (n = 3) are shown and analyzed by student's t-test. \* p ≤  
 435 0.05, \*\* p ≤ 0.01, \*\*\*\* p ≤ 0.0001.

436

437

438

439

440 A similar comparison was made at Day 7, where both M(4/13) and M(4/13/10) retained enhanced  
441 *Arg1*, *Retnla* and *Chil3* expression and displayed enhanced *Nos2* expression compared with naïve M(-  
442 ) (**Figure S6B**). Regarding accompanying CD80, CD206 and MHC II expression (**Figure S6C**): in all tested  
443 conditions, CD206 expression was comparable between M(4/13) and M(4/13/10), whereas CD80  
444 expression was elevated in M(4/13/10). Furthermore, M(4/13) retained an elevated expression of  
445 MHC II, which increased two- and four-fold following stimulation with Mtb and PAM3CSK4,  
446 respectively, whereas this elevation did not occur to the same degree in M(4/13/10).

447 Our next question was how the addition of IL-10 during alternative activation would affect  
448 mycobacterial killing capacity. The BMDMs were incubated with roughly 30 BCG per cell on Day 0 or  
449 Day 6. There were some differences in bacterial uptake, where M(4/13) took up more bacteria per cell  
450 on Day 6, leading to an MOI of 1-4 (**Figure 6B**). CFU counts (**Figure S1C**) were used to calculate killing  
451 of internalized BCG. On Day 0, M(-), M(4/13) and M(4/13/10) displayed comparable killing capacity  
452 (**Figure 6C**). Moreover, BCG infection did not induce detectable levels of TNF $\alpha$  or IL-10 (**Figure S1D**).  
453 On Day 6, M(-) and M(4/13/10) maintained a similar level of BCG killing, whereas M(4/13) displayed  
454 enhanced bactericidal capacity. This indicated that IL-10 hindered the enhanced bactericidal response  
455 induced by prior IL-4 and IL-13 macrophage activation. The difference in bacterial killing capacity was  
456 further supported by confocal microscopy 27 hours after infection, where it was observed that M(-)  
457 and M(4/13/10) had markedly more bacteria per cell compared with M(4/13) (**Figure 6D**).  
458 Furthermore, whereas M(4/13) showed a shift towards pro-inflammatory cytokine secretion, with IL-  
459 10 secretion being reduced whilst TNF $\alpha$  production was largely intact, M(4/13/10) secreted  
460 significantly less TNF $\alpha$  than M(4/13), whilst IL-10 secretion was not enhanced (**Figure 6E**). This would  
461 indicate that IL-10 regulated the training induced by IL-4 and IL-13, preventing both the enhancement  
462 of killing capacity and the accompanying pro-inflammatory cytokine profile.

463 This difference in cytokine response profile was confirmed by carrying out similar experiments  
464 with Mtb. Whilst M(4/13), secreted lower concentrations of TNF $\alpha$ , IL-6 and IL-10 than M(-) on Day 1  
465 (**Figure S6D**), but elevated TNF $\alpha$  and IL-6 by Day 7 (**Figure 6F**), while inflammatory cytokine secretion  
466 by M(4/13/10) was reduced on both Day 1 and Day 7. Furthermore, whilst both M(4/13) and  
467 M(4/13/10) displayed similar expression of *Arg1* following Mtb stimulation on Day 7, the addition of  
468 IL-10 during activation hindered the upregulation of *Nos2* observed in trained M(4/13) (**Figure S6E**).  
469 Overall, IL-10 appeared to impede the enhanced pro-inflammatory and bactericidal capacity induced  
470 by IL-4 and IL-13 innate training.

471

472

## 473 Discussion

474 Although “classical” and “alternative” activation are used to describe the two extremes of  
475 macrophage polarization, the reality is a broad spectrum of activation states, affected by a multitude  
476 of signals. Moreover, growing evidence has shown that the macrophage population during *M.*  
477 *tuberculosis* infection is highly heterogeneous, and thus elucidating which subtypes best contain the  
478 bacterium is critical for understanding disease control (A. Khan, Singh, Hunter, & Jagannath, 2019).  
479 Alternative macrophage activation is moreover relevant to TB pathology, both because alveolar  
480 macrophages – the initial hosts of *M. tuberculosis* upon infection – are biased towards alternative  
481 activation (Huang, Nazarova, & Russell, 2019), and also considering the influence of concurrent  
482 parasitic infection. The current study shows that alternative macrophage activation stimuli impact  
483 innate immune memory at least in part via epigenetic modification (**Figure S3C**); an additional  
484 dimension to the noted diversity among macrophage populations.

485         Whilst acute alternative macrophage activation has been demonstrated to lead to reduced  
486 control of *M. tuberculosis* growth (Kahnert et al., 2006), resulting in greater bacterial burden (Moreira-  
487 Teixeira et al., 2016; Orecchioni et al., 2019), there have been some conflicting data concerning the  
488 interplay between parasites and mycobacterial infections. Parasitic infection has been shown to  
489 enhance mycobacterial bacterial burden *in vivo* (Monin et al., 2015; Potian et al., 2011) and enhance  
490 human TB pathology (Amelio et al., 2017; Mabbott, 2018), but has in some cases also been shown to  
491 enhance protection against mycobacterial infection (Aira, Andersson, Singh, McKay, & Blomgran,  
492 2017; O’Shea et al., 2018). Furthermore, discrepancies have been highlighted specifically regarding  
493 macrophage activation. In a model of *M. tuberculosis* macrophage infection *in vitro*, prior incubation  
494 (48hr) with antigens from *Hymenolepis diminuta*, *Trichuris muris* and *Schistosoma mansoni* resulted  
495 in alternative macrophage activation, but only incubation with the *H. diminuta* and *T. muris* antigens  
496 resulted in enhanced mycobacterial growth (Aira et al., 2017). Moreover, the increased growth was  
497 accompanied by enhanced secretion of IL-10. This however was not surprising, given that IL-10 has  
498 been demonstrated to prevent phagolysosome maturation in human macrophages (O’Leary et al.,  
499 2011) and promote TB disease progression in mice (Beamer et al., 2008). Herein, an additional  
500 mechanism is proposed, as IL-10 appears to be a key determinant of alternative macrophage training  
501 and subsequent control of mycobacterial challenge. BMDM activation with IL-4 and IL-13, with or  
502 without the addition of IL-10, resulted in similar activation states: comparable expression of *Arg1*,  
503 *Retnla* and *Chil3* on Day 0 (**Figure 6A**) and 7 (**Figure S6B**), reduced expression of CD80 and upregulation  
504 of CD206 on Day 0 (**Figure S6A**), as well as reduced secretion of cytokines TNF $\alpha$ , IL-6 and IL-10  
505 following stimulation with Mtb on Day 0 (**Figure S6D**). Whilst this hyporesponsive profile was  
506 maintained in the M(4/13/10), the trained M(4/13) on the other hand demonstrate enhanced pro-

507 inflammatory and bactericidal mechanisms in response to mycobacterial challenge a week after initial  
508 activation (**Figure 6**). This intimated that IL-10 was a negative regulator of innate training induced by  
509 IL-4 and IL-13 and supports that distinct cytokine mediated modes of alternative macrophage  
510 activation differ regarding their innate memory programming.

511 The trained M(4/13) in response to mycobacterial challenge adopted a phenotype similar to  
512 classically activated BMDMs: a skewing towards pro-inflammatory cytokine secretion with  
513 concomitant increased expression of *Nos2* and NO production (**Figure 2**), as well as enhanced  
514 mycobacterial killing capacity (**Figure 1**). Classical macrophage activation is intrinsically linked with a  
515 glycolytic shift in metabolism; it is thus not surprising that prior work has identified an enhancement  
516 of glycolysis as critical for efficient *M. tuberculosis* killing (Gleeson et al., 2016; Huang et al., 2018) and  
517 that impeding glycolysis attenuates macrophages ability to control TB infection (Hackett et al., 2020).  
518 Moreover, upon *M. tuberculosis* infection, macrophages appear to undergo a biphasic metabolic  
519 profile, where they switch from an initial increase in glycolytic metabolism to an enhancement of the  
520 TCA cycle and OXPHOS; a switch which allows mycobacterial survival and disease progression (Shi et  
521 al., 2019). As such, it was expected that the trained M(4/13) would shift towards glycolytic  
522 metabolism. However, this was not the case, as Mtb stimulation resulted in enhanced OCR and SRC,  
523 indicating the use and upregulation of OXPHOS (**Figure 3**). Furthermore, LC-MS analysis of metabolites  
524 indicated increased use of FAO, as well as enhanced creatine, further supporting the continued use of  
525 M2-typical metabolism. This was moreover confirmed with the use of the ATP synthase inhibitor  
526 oligomycin, where it was demonstrated that inhibition of OXPHOS reduced trained M(4/13) cytokine  
527 secretion, whereas by contrast M(IFN $\gamma$ /LPS) TNF $\alpha$  upregulation was unaffected. Furthermore, when  
528 trained M(4/13) were incubated in a glucose depleted environment during the week preceding  
529 secondary stimulation, the glucose depletion enhanced the pro-inflammatory shift: increased TNF $\alpha$   
530 and IL-6 secretion combined with reduced IL-10 production (**Figure 4B**). This was a stark contrast to  
531 the effect of glucose depletion on untrained M(-) and trained M(IFN $\gamma$ /LPS), where the secretion of all  
532 measured cytokines was attenuated. This contrast between M(4/13) and M(IFN $\gamma$ /LPS) cemented their  
533 differences regarding metabolic dependency on glucose.

534 It is of note that the addition of a glycolysis inhibitor reduced cytokine secretion, from M(-),  
535 M(IFN $\gamma$ /LPS), as well as M(4/13) following secondary stimulation (**Figures S5A-B**). That inhibition of  
536 glycolysis impeded pro-inflammatory cytokine secretion, but glucose depletion did not, indicated that  
537 glycolysis in trained M(4/13) was fueling the TCA cycle and downstream OXPHOS, and upon glucose  
538 depletion other pathways, such as glutaminolysis, were compensating for this loss. Glutaminolysis has  
539 been shown to be upregulated following macrophage activation with IL-4 and has been demonstrated  
540 to compensate for glycolysis inhibition in driving the TCA cycle and OXPHOS (Wang et al., 2018). In the

541 present study, it was moreover observed that the use of a glutaminolysis inhibitor reduced TNF $\alpha$  and  
542 IL-6 secretion following secondary stimulation in trained M(4/13) specifically, and not in untrained M(-  
543 ) or M(IFN $\gamma$ /LPS) (**Figure 4A**). It should be noted that prior work has identified differences in  
544 macrophage metabolic profiles in response to infection with live *M. tuberculosis* compared with the  
545 killed bacterium or infection with attenuated BCG (Cumming, Addicott, Adamson, & Steyn, 2018).  
546 However, the consensus is that classic macrophage activation, and an accompanying shift to glycolytic  
547 metabolism, is paramount for effective mycobacterial killing and propagation of inflammatory  
548 responses. It is surprising therefore that these results summarily intimated that trained M(4/13)  
549 maintain OXPHOS to fuel anti-mycobacterial responses.

550 The metabolic profile in trained M(4/13), as summarized in **Figure 5**, is not only distinct from  
551 classically activated macrophages, but also from that seen with other training stimuli, such as  $\beta$ -glucan.  
552 Innate training is being tested as a means to bolster innate immunity against *M. tuberculosis* (Khader  
553 et al., 2019) and it was recently reported that training with  $\beta$ -glucan was protective against subsequent  
554 *M tuberculosis* infection, as seen by enhanced human monocyte pro-inflammatory cytokine secretion  
555 and increased mouse survival *in vivo* (Moorlag et al., 2020). Similar to classical macrophage activation,  
556  $\beta$ -glucan training results in a glycolytic shift, as demonstrated in human monocytes (Cheng et al.,  
557 2014). As such, the phenotype of the trained M(4/13) is distinct from other macrophage phenotypes  
558 previously demonstrated to protect against TB, and thus offers an additional avenue for future  
559 research regarding strategies for combatting this disease.

560 Van den Bossche et al. in 2016 highlighted a key adaptive distinction between classical and  
561 alternative macrophage activation: that alternatively activated macrophages can be “re-polarized”  
562 due to their metabolic versatility, whereas the mitochondrial dysfunction which occurs during classical  
563 macrophage activation prevents such reprogramming (Van den Bossche et al., 2016). In the current  
564 study, an additional adaptive capacity is identified: that activation with IL-4 and IL-13 programs  
565 BMDMs to better respond to a mycobacterial challenge, whilst crucially retaining their metabolic  
566 diversity.

567 In conclusion, our work presents mechanistic insight into how innate training via IL-4 and IL-  
568 13 can enhance macrophage pro-inflammatory responses and mycobacterial killing. This unexpected  
569 finding shows how macrophage plasticity belies the usual M1-M2 dichotomy and provides a new  
570 framework to explore the impact of comorbidities, such as parasitic infections, on TB disease burden.

571

572

573 **Materials and Methods**

574 **Table 1. Sources of materials and resources**

| REAGENT or RESOURCE                                                  | SOURCE                                                          | IDENTIFIER                                           |
|----------------------------------------------------------------------|-----------------------------------------------------------------|------------------------------------------------------|
| <b>Antibodies</b>                                                    |                                                                 |                                                      |
| Anti-CD11b-APC-eFluor 780                                            | Thermo Fisher Scientific, Waltham, Massachusetts                | Cat# 47-0112-82, RRID: AB_1603193, Clone M1/70       |
| Anti-CD206-PE                                                        | BioLegend, San Diego, California                                | Cat# 141706, RRID: AB_10895754, Clone C068C2         |
| Anti-CD80-FITC                                                       | BD Biosciences, Franklin Lakes, New Jersey                      | Cat# 561954, RRID: AB_10896321, Clone 16-10A1        |
| Anti-F4/80-PerCP-Cy5.5                                               | Thermo Fisher Scientific, Waltham, Massachusetts                | Cat# 45-4801-82, RRID: AB_914345, Clone BM8          |
| Anti-MHC class II-eFlour 450                                         | Thermo Fisher Scientific, Waltham, Massachusetts                | Cat# 48-5321-82, RRID: AB_1272204, Clone M5/114.15.2 |
| Fc block: Anti-CD16/CD32                                             | BD Biosciences, Franklin Lakes, New Jersey                      | Cat# 553142, RRID: AB_394657, Clone 2.4G2            |
| <b>Bacterial and virus strains</b>                                   |                                                                 |                                                      |
| Non-viable irradiated <i>Mycobacterium tuberculosis</i> strain H37Rv | BEI resources, Manassas, Virginia                               | NR-49098                                             |
| Bacille Calmette-Guérin (BCG) Denmark 1331                           | Gift to Prof. Gordon from Prof. Behr, McGill University, Canada | N/A                                                  |
| <b>Chemicals, peptides, and recombinant proteins</b>                 |                                                                 |                                                      |
| 2-deoxyglucose, 2-DG                                                 | Sigma Aldrich, Burlington, Massachusetts                        | Cat# D8375                                           |
| 4% PFA in PBS                                                        | Santa Cruz Biotechnology, Dallas, Texas                         | Cat# NC0238527                                       |
| Acetonitrile                                                         | Thermo Fisher Scientific, Waltham, Massachusetts                | Cat# 10001334                                        |
| Antimycin-A                                                          | Sigma Aldrich, Burlington, Massachusetts                        | Cat# A8674                                           |

|                                              |                                                        |                           |
|----------------------------------------------|--------------------------------------------------------|---------------------------|
| BPTES                                        | Sigma Aldrich,<br>Burlington,<br>Massachusetts         | Cat# SML0601-5mg          |
| CpG                                          | InvivoGen, San Diego,<br>California                    | Cat# ODN M362             |
| DMEM (high glucose)                          | Sigma Aldrich,<br>Burlington,<br>Massachusetts         | Cat# D5671                |
| DMEM (no glucose)                            | Gibco, Waltham,<br>Massachusetts                       | Cat# 11966025             |
| dNTP Mix                                     | Meridian Bioscience,<br>Cincinnati, Ohio               | Cat# BIO-39028            |
| FBS                                          | Biosera,<br>Kansas City, Missouri                      | Batch# 015BS551           |
| FCCP                                         | Sigma Aldrich,<br>Burlington,<br>Massachusetts         | Cat# C2920                |
| Fixable Viability Stain 510                  | Invitrogen, Waltham,<br>Massachusetts                  | Cat# 564406               |
| Glucose                                      | Sigma Aldrich,<br>Burlington,<br>Massachusetts         | Cat# G8270                |
| L-Glutamine                                  | Gibco, Waltham,<br>Massachusetts                       | Cat# 25030-024            |
| Glycerol                                     | Sigma Aldrich,<br>Burlington,<br>Massachusetts         | Cat# G2025                |
| Heat-Shocked Bovine Serum Albumin (BSA)      | Thermo Fisher<br>Scientific, Waltham,<br>Massachusetts | Cat# 12881630             |
| Hoechst 33342                                | Thermo Fisher<br>Scientific, Waltham,<br>Massachusetts | Cat# 10150888             |
| KAPA SYBR® FAST Rox low qPCR Kit Master Mix  | Sigma Aldrich,<br>Burlington,<br>Massachusetts         | Cat# KK4622               |
| LPS, <i>Escherichia coli</i> , serotype R515 | Enzo, Farmingdale,<br>New York                         | Cat# ALX-581-007-<br>L002 |
| Methanol                                     | Thermo Fisher<br>Scientific, Waltham,<br>Massachusetts | Cat# 10284580             |
| Middlebrook 7H11 powder                      | Sigma Aldrich,<br>Burlington,<br>Massachusetts         | Cat# M0428                |



|                                               |                                                           |                 |
|-----------------------------------------------|-----------------------------------------------------------|-----------------|
| Middlebrook 7H9 powder                        | Sigma Aldrich,<br>Burlington,<br>Massachusetts            | Cat# M0178      |
| M-MLV reverse transcriptase                   | Promega, Madison,<br>Wisconsin                            | Cat# M3683      |
| Modified Auramine-O stain and quencher        | Scientific Device<br>Laboratory, Des<br>Plaines, Illinois | Cat# 345-04L    |
| MTA                                           | Sigma Aldrich,<br>Burlington,<br>Massachusetts            | Cat# D5011-25MG |
| Oligomycin                                    | Sigma Aldrich,<br>Burlington,<br>Massachusetts            | Cat# 75351      |
| PAM3CSK4                                      | InvivoGen, San Diego,<br>California                       | Cat# tlr1-pms   |
| PBS, sterile                                  | Gibco, Waltham,<br>Massachusetts                          | Cat# 14190094   |
| Penicillin-Streptomycin                       | Gibco, Waltham,<br>Massachusetts                          | Cat# 15-070-063 |
| Phalloidin-Alexa Fluor 647                    | Invitrogen, Waltham,<br>Massachusetts                     | Cat# A22287     |
| Poly I:C                                      | InvivoGen, San Diego,<br>California                       | Cat# tlr1-pic   |
| Pyruvate                                      | Sigma Aldrich,<br>Burlington,<br>Massachusetts            | Cat# P5280      |
| Radio-Immunoprecipitation Assay (RIPA) buffer | Sigma Aldrich,<br>Burlington,<br>Massachusetts            | Cat# R0278-50ML |
| Random Hexamer Primer Mix                     | Meridian Bioscience,<br>Cincinnati, Ohio                  | Cat# BIO-38028  |
| Recombinant murine IFN $\gamma$               | Peprtech, Cranbury,<br>New Jersey                         | Cat# 315-05     |
| Recombinant murine IL-10                      | Peprtech, Cranbury,<br>New Jersey                         | Cat# 210-10     |
| Recombinant murine IL-13                      | Peprtech, Cranbury,<br>New Jersey                         | Cat# 210-13     |
| Recombinant murine IL-4                       | Peprtech, Cranbury,<br>New Jersey                         | Cat# 214-14     |
| Resiquimod/R848                               | InvivoGen, San Diego,<br>California                       | Cat# tlr1-r848  |
| Reverse Transcriptase Buffer                  | Promega, Madison,<br>Wisconsin                            | Cat# A3561      |

|                                        |                                                  |                                    |
|----------------------------------------|--------------------------------------------------|------------------------------------|
| RNaseOUT                               | Invitrogen, Waltham, Massachusetts               | Cat# 10777019                      |
| Rotenone                               | Sigma Aldrich, Burlington, Massachusetts         | Cat# R8875                         |
| Seahorse Calibration Fluid pH 7.4      | Agilent, Santa Clara, California                 | Part# 100840-000                   |
| Seahorse XF DMEM Medium                | Agilent, Santa Clara, California                 | Cat# 103575-100                    |
| Sodium Chloride                        | Sigma Aldrich, Burlington, Massachusetts         | Cat# S9888                         |
| Tween20                                | Sigma Aldrich, Burlington, Massachusetts         | Cat# P1379-1L                      |
| Valine-d8                              | CK isotopes, Newtown Unthank, UK                 | Cat# DLM-488                       |
| Vectashield mounting media             | VWR, Vector Laboratories                         | Cat# 101098-042                    |
| Water, sterile                         | Baxter, Deerfield, Illinois                      | Cat# UKF7114                       |
| <b>Critical commercial assays</b>      |                                                  |                                    |
| BCA Protein Assay Kit (Pierce™)        | Thermo Fisher Scientific, Waltham, Massachusetts | Cat# 23225                         |
| Griess Reagent System kit              | Promega, Madison, Wisconsin                      | Cat# G2930                         |
| High Pure RNA Isolation Kit            | Roche, Basel, Switzerland                        | Cat# 11828665001                   |
| Mouse IL-10 ELISA MAX                  | BioLegend, San Diego, California                 | Cat# 431411                        |
| Mouse IL-6 ELISA MAX                   | BioLegend, San Diego, California                 | Cat# 431301                        |
| Mouse TNF $\alpha$ DuoSet ELISA        | R&D Systems, Minneapolis, Minnesota              | Cat# DY410                         |
| <b>Deposited data</b>                  |                                                  |                                    |
| Raw and analyzed data                  | This Paper                                       | DOI:<br>10.17632/ncbph43<br>m85.1. |
| <b>Experimental models: Cell lines</b> |                                                  |                                    |

|                                        |                                                  |                                                                                                                                                                                                                                                                                                                                                                                                       |
|----------------------------------------|--------------------------------------------------|-------------------------------------------------------------------------------------------------------------------------------------------------------------------------------------------------------------------------------------------------------------------------------------------------------------------------------------------------------------------------------------------------------|
| L929                                   | gift of Dr. Muñoz-Wolf, Trinity College, Dublin  | N/A                                                                                                                                                                                                                                                                                                                                                                                                   |
| Experimental models: Organisms/strains |                                                  |                                                                                                                                                                                                                                                                                                                                                                                                       |
| WT mice used for cell isolations       | In-house colonies                                | C57BL/6J0laHsd                                                                                                                                                                                                                                                                                                                                                                                        |
| Oligonucleotides                       |                                                  |                                                                                                                                                                                                                                                                                                                                                                                                       |
| Primers for <i>Actb</i>                | See Table S1                                     | N/A                                                                                                                                                                                                                                                                                                                                                                                                   |
| Primers for <i>Arg1</i>                | See Table S1                                     | N/A                                                                                                                                                                                                                                                                                                                                                                                                   |
| Primers for <i>Chit13</i>              | See Table S1                                     | N/A                                                                                                                                                                                                                                                                                                                                                                                                   |
| Primers for <i>Ldha</i>                | See Table S1                                     | N/A                                                                                                                                                                                                                                                                                                                                                                                                   |
| Primers for <i>Myc</i>                 | See Table S1                                     | N/A                                                                                                                                                                                                                                                                                                                                                                                                   |
| Primers for <i>Nos2</i>                | See Table S1                                     | N/A                                                                                                                                                                                                                                                                                                                                                                                                   |
| Primers for <i>Pkm2</i>                | See Table S1                                     | N/A                                                                                                                                                                                                                                                                                                                                                                                                   |
| Primers for <i>Retnla</i>              | See Table S1                                     | N/A                                                                                                                                                                                                                                                                                                                                                                                                   |
| Primers for <i>Sdha</i>                | See Table S1                                     | N/A                                                                                                                                                                                                                                                                                                                                                                                                   |
| Primers for <i>Tbp</i>                 | See Table S1                                     | N/A                                                                                                                                                                                                                                                                                                                                                                                                   |
| Software and algorithms                |                                                  |                                                                                                                                                                                                                                                                                                                                                                                                       |
| FlowJo 7                               | FlowJo LLC, Franklin Lakes, New Jersey           | <a href="https://www.flowjo.com/solutions/flowjo">https://www.flowjo.com/solutions/flowjo</a>                                                                                                                                                                                                                                                                                                         |
| MetaboAnalyst 5.0                      | Xia Lab @ McGill                                 | <a href="https://www.metaboolanalyst.ca/">https://www.metaboolanalyst.ca/</a>                                                                                                                                                                                                                                                                                                                         |
| Microsoft Office Excel                 | Microsoft, Redmond, Washington                   | <a href="https://products.office.com/en-au/excel">https://products.office.com/en-au/excel</a>                                                                                                                                                                                                                                                                                                         |
| Prism 8.2                              | GraphPad Software, San Diego, California         | <a href="https://www.graphpad.com/scientific-software/prism/">https://www.graphpad.com/scientific-software/prism/</a>                                                                                                                                                                                                                                                                                 |
| Tracefinder 5.0                        | Thermo Fisher Scientific, Waltham, Massachusetts | <a href="https://www.thermofisher.com/ie/en/home/industrial/mass-spectrometry/liquid-chromatography-mass-spectrometry-lc-ms/lc-ms-software/lc-ms-data-acquisition-software/tracefinder-software.html">https://www.thermofisher.com/ie/en/home/industrial/mass-spectrometry/liquid-chromatography-mass-spectrometry-lc-ms/lc-ms-software/lc-ms-data-acquisition-software/tracefinder-software.html</a> |

## 576 **Experimental Model and Subject Details**

### 577 **Animals**

578 Mice used for primary cell isolation were eight to 16-week-old wild-type C57BL/6 mice that were bred  
579 in the Trinity Biomedical Sciences Institute Bioresources Unit. Animals were maintained according to  
580 the regulations of the Health Products Regulatory Authority (HPRA). Animal studies were approved by  
581 the TCD Animal Research Ethics Committee (Ethical Approval Number 091210) and were performed  
582 under the appropriate license (AE191364/P079).

### 583 **Cell Isolation and Culture**

584 Bone marrow-derived macrophages (BMDMs) were generated as described previously by our  
585 group.(Lebre, Hanlon, Boland, Coleman, & Lavelle, 2018) Briefly, bone marrow cells were extracted  
586 from the leg bones and were cultured in high glucose DMEM, supplemented with 8% v/v fetal bovine  
587 serum (FBS), 2 mM L-glutamine, 50 U ml<sup>-1</sup> penicillin, 50 µg ml<sup>-1</sup> streptomycin (hereafter referred to as  
588 complete DMEM [cDMEM]). Cells were plated on non-tissue cultured treated petri dishes (Corning)  
589 and supplemented with 25% v/v of L929 cell line conditioned medium containing macrophage colony-  
590 stimulating factor (M-CSF) on day -8. Fresh medium was added on day -5 and on day -2 adherent cells  
591 were detached by trypsinization and collected. Unless specified otherwise, for acute/polarization  
592 studies, BMDMs were seeded in 12-well plates at  $0.9 \times 10^6$  BMDMs per well, and for training studies,  
593 BMDMs were seeded in 24-well plates at  $0.2 \times 10^6$  BMDMs per well.

594 On day -1 BMDMs were cultured with medium (naïve/untrained) or activated with 25 ng ml<sup>-1</sup> IFN $\gamma$  with  
595 10 ng ml<sup>-1</sup> LPS (classical activation), or 40 ng ml<sup>-1</sup> IL-4 with 20 ng ml<sup>-1</sup> IL-13, with or without 40 ng ml<sup>-1</sup>  
596 IL-10 (alternative activation) – all included 15% L929 conditioned media. After 24 hours, the  
597 supernatant was replaced with fresh media (with 10% L929 conditioned media). For acute  
598 activation/polarization studies, the BMDMs were left to rest for 2 hours before experiment. For  
599 training studies, the BMDMs were left to rest, fed on day 3 (media supplemented with 7% L929  
600 conditioned media) and experiments were carried out on day 6. The amount of L929 conditioned  
601 media added on each day was consistent for all experiments.

### 602 **BCG Infection**

603 Mature BMDMs were seeded in 24-well plates at  $0.5 \times 10^6$  cells (acute activation) or  $0.2 \times 10^6$  cells  
604 (training) per well on day -2. For imaging of internalized BCG in untrained and trained BMDMs,  $0.2 \times$   
605  $10^6$  BMDMs were seeded on circular glass coverslips (placed in 24 well plates, one coverslip per well)  
606 that had been previously treated with sodium hydroxide to aid attachment.

607 BMDMs were incubated with media (naïve) or activated as outlined above on day -1, for 24  
608 hours before BMDMs were washed and fresh media was added. For acute activation studies, BMDMs

609 were infected with BCG Denmark minimum 3 hours later. For training studies, BMDMs were fed on  
610 day 3 and infected with BCG Denmark on Day 6.

611       Regarding infection dose (BCG per cell), for infection in acutely activated BMDMs, cell number  
612 per well was assumed to be  $0.5 \times 10^6$ . For infecting trained BMDMs, three extra wells were prepared  
613 for all conditions and BMDMs were removed from these wells by trypsinization on day 5, pooled and  
614 counted in triplicate. Prepared BCG single cell suspension (see below) was diluted to reach an intended  
615 infection dose of 5 BCG per cell (as measured by  $OD_{600}$ , where 0.1 is estimated to be  $10 \times 10^6$  bacteria  
616  $ml^{-1}$ ). Each infection dose was measured via CFU counts (see below) and was thus subsequently  
617 corrected to an actual infection dose of roughly 30 BCG per cell.

618       3 hours post infection the supernatant was removed and the infected BMDMs were washed  
619 twice with Dulbecco's Phosphate Buffered Saline (PBS) to remove extracellular bacteria, and fresh  
620 media was added.

621       To measure cytokine secretion at each time point (3-, 27- and 51 hours post infection),  
622 supernatant was collected and filtered (polyethersulfone [PES] 0.22  $\mu m$  Luer lock syringe filter; Millex-  
623 GP) to remove BCG, prior to specific cytokines being measured by ELISA.

624       For CFU counts, at each time point the media was removed, wells were washed once with PBS  
625 before the BMDMs were lysed with 0.05% Tween20 in water. The cell lysate was diluted in pre-  
626 warmed (37 °C) 7H9 media, and 50  $\mu l$  of dilutions  $10^{-2}$ - $10^{-6}$  were spread onto enriched 7H11 agar plates  
627 by dotting. Agar plates were incubated at 37 °C for 6 weeks and colonies were counted once a week  
628 from week 2 and on. CFU counts 3 hours gave the multiplicity of infection (MOI).

629       For imaging internalized BCG (wells containing glass coverslips), media was removed, BMDMs  
630 were washed with PBS and then fixed with 4% paraformaldehyde (in PBS) overnight. The  
631 paraformaldehyde was then removed and coverslips were stored in PBS.

632

### 633 **Stimulation Experiments**

634 Naïve (media control) or activated BMDMs were incubated with media or secondary stimuli on day 0  
635 (acute activation/polarization) or day 6 (training). Secondary stimuli: 150  $\mu g ml^{-1}$  gamma-irradiated  
636 whole cells of *Mycobacterium tuberculosis* strain H37Rv (concentration measured by  $OD_{600}$ , where 100  
637  $mg ml^{-1}$  was 0.32), 35  $ng ml^{-1}$  PAM3CSK4, 25  $ng ml^{-1}$  LPS, 5  $\mu g ml^{-1}$  Poly I:C, 0.55  $\mu g ml^{-1}$  R848, 10  $\mu g ml^{-1}$   
638  $^1 CpG$ .

639       For histone methylation inhibition: on day -2 BMDMs were incubated with MTA (final  
640 concentration 1 mM) one hour prior to media incubation or activation as outlined above.

641 For metabolic inhibition experiments: on day 6 BMDMs were pre-incubated with 1mM 2-DG  
642 for 3 hours, 2  $\mu$ M oligomycin or 10  $\mu$ M BPTES 1 hour prior to media incubation or secondary  
643 stimulation.

644 For glucose depletion training experiment: untrained or trained BMDMs were incubated with  
645 either the regular high glucose cDMEM or glucose depleted cDMEM, with DMEM devoid of glucose  
646 (Gibco), from day -2 until incubation with media or secondary stimulation on Day 6 (fed day 3 with the  
647 same media as given on day -2). Note, the glucose depleted cDMEM included 8% v/v FBS and the same  
648 amount of L929 conditioned media as outlined previously, both of which provided a source of glucose.

#### 649 **Seahorse**

650 All real-time measurements of oxygen consumption rate (OCR) and extracellular acidification rate  
651 (ECAR) were measured by using Seahorse system: Seahorse XFe96 Analyzer (Agilent). The analysis  
652 used was a Mitochondrial Stress Test (using a standard Agilent Seahorse protocol).

653 On day -2, mature BMDMs were seeded in a 96-well Seahorse plate (Agilent): 100,000 cells  
654 per well for acute activation studies or 30,000 cells per well for training studies. BMDMs were  
655 activated on day -1 as outlined and analyzed on either day 0 (24 hours after activation) or day 6 (fed  
656 on day 3), with or without secondary stimulation on day 5 (training studies).

657 The day before analysis, a Seahorse Cartridge (Agilent) was incubated overnight at 37 °C  
658 (incubator devoid of CO<sub>2</sub>). The following day, the sterile water was replaced with Calibration Fluid at  
659 pH 7.4 incubated as before for 90 minutes before the analysis.

660 An hour before the analysis, in the Seahorse plate regular cDMEM was replaced with Seahorse  
661 XF DMEM, supplemented with 10 mM glucose, 1 mM pyruvate and 2 mM L-glutamine. The BMDMs  
662 were then incubated for an hour at 37 °C (incubator devoid of CO<sub>2</sub>).

663 15 minutes before the analysis, the cartridge was removed and reagents/inhibitors were  
664 added to their respective ports: oligomycin (port A, final concentration 10  $\mu$ M), FCCP (port B, final  
665 concentration 10  $\mu$ M), rotenone and antimycin-A (port C, final concentrations 5  $\mu$ M each).

666 The analysis was carried out according to the manufacturer's instructions. Recorded values  
667 less than zero were disregarded.

668 For training experiments, protein concentration was used to standardize the OCR and ECAR  
669 measurements. Supernatant was removed, cells were washed once in PBS and 10  $\mu$ l of RIPA buffer  
670 was added per well. After pipetting up and down and scraping, the buffer was collected and samples  
671 from the same condition were pooled. 20  $\mu$ l of pooled solution was used to measure protein  
672 concentration, using the Pierce bicinchoninic acid (BCA) assay kit (Thermo Scientific) according to the  
673 manufacturer's instructions (microplate procedure). Absorbance was measured at 560 nm.

## 674 **Metabolomics (LC-MS) sample preparation**

675 On day -2, BMDMs were seeded in 6-well plates:  $1 \times 10^6$  cells/well and activated on day -1 with IL-  
676 4/13 as outlined or incubated with media. BMDMs were fed on day 3 and incubated with irradiated  
677 *M. tuberculosis* on Day 6 for 24 hours. Prior to metabolite extraction, cells were counted using a  
678 separate counting plate prepared in parallel and treated exactly like the experimental plate.  
679 Supernatant was removed and cells were washed once in PBS. After aspiration, the BMDMs were kept  
680 at -80 °C or on dry ice. Metabolites were extracted by adding chilled extraction buffer (500  $\mu$ l/ $1 \times 10^6$   
681 cells), followed by scraping (carried out on dry ice). Buffer was transferred to chilled eppendorf tubes  
682 and shaken in a thermomixer at maximum speed (2000 rpm) for 15 minutes at 4 °C. Following  
683 centrifugation at maximum speed for 20 minutes, roughly 80% of supernatant was transferred into  
684 labelled LC-MS vials, taking care to avoid pellet and any solid debris.

## 685 **Flow Cytometry**

686 On day -2,  $0.8 \times 10^6$  mature BMDMs were seeded on non-tissue cultured treated 35 mm petri dishes  
687 (Corning) and activated as previously outlined on Day -1. The naïve or activated/trained BMDMs were  
688 harvested at two separate time points: day 0 (24 hours post activation for acute activation  
689 characterisation) or day 6 (fed on day 3), with or without secondary stimulation on day 5 as specified  
690 in figure legends (training experiments).

691 For analysis, BMDMs were placed on ice for 30 min before harvesting with PBS-EDTA (5 mM)  
692 solution by gently pipetting up and down and transferring to flow cytometry tubes. Cells were  
693 incubated with Fixable Viability Stain 510 at RT for 15 min. After washing with PBS, cells were stained  
694 with anti-mouse Fc block, 15 minutes prior staining with CD80-FITC, CD206-PE, F4/80-PerCP-Cy5.5,  
695 CD11b-APC-eFluor 780, MHC class II-eFluor 450 for an additional 30 min at 4 °C. The cells were washed  
696 with PBS and resuspended in flow cytometry buffer (1% FBS in PBS). Samples were acquired on a BD  
697 Canto II flow cytometer and the data was analysed by using FlowJo software.

698

## 699 **Method Details**

### 700 **BCG Preparation and Plating**

701 Bacille Calmette-Guérin (BCG) Denmark (OD<sub>600</sub> 0.1) was incubated in 7H9 media at 37 °C with rotation  
702 until the OD<sub>600</sub> 0.5-0.8 (logarithmic growth phase) was reached.

703 Single cell suspension was prepared as follows: bacteria were pelleted by centrifugation and  
704 7H9 media was removed. Bacteria were vortexed with glass beads before pre-warmed (37 °C) DMEM  
705 was added and bacteria were left to sediment for 5 minutes. Bacterial suspension was carefully  
706 collected (avoiding disruption of the pellet) and centrifuged again to pellet large clumps. Suspension

707 was collected (avoiding the pellet). Suspension was passed through a 26G needle 15 times to  
708 disaggregate bacterial clumps.

709 Bacterial concentration was estimated by OD<sub>600</sub> (where 0.1 was estimated as  $10 \times 10^6$  bacteria  
710 ml<sup>-1</sup>) and infection dose was confirmed by colony forming unit (CFU) counts.

711 7H11 agar plates (for CFU counts) were made up as follows: 10.5 g middlebrook 7H11 powder  
712 and 2.5 ml glycerol was dissolved in distilled water to reach 500 ml and autoclaved. Once cooled  
713 sufficiently, 50 ml sterile-filtered (0.22 µm; SteriCup [Millipore]) albumin-dextrose-sodium chloride  
714 (ADN) enrichment was added. For 1 liter of ADN enrichment: 50 g fatty acid-free, heat-shocked bovine  
715 serum albumin, 8.5 g sodium chloride and 20 g glucose were dissolved in sterile water to reach 1 liter.  
716

### 717 **Staining and Imaging of Internalized BCG**

718 For staining the coverslips contained in 24-well plates, PBS was removed and 17 µM Hoechst 33342  
719 and 7.5 U Phalloidin-Alexa Fluor 647 (in 1 ml PBS) was added to each well. After half an hour (in the  
720 dark), the solution was removed and the coverslips were washed with PBS. 200 µl Modified Auramine-  
721 O stain was added for 2 minutes (in the dark), after which the stain was removed and the wells were  
722 washed with PBS. To quench any extracellular BCG, 200 µl Auramine-O Quencher de-colorizer was  
723 added for 2 minutes (in the dark) and then the quencher was removed and the coverslips were washed  
724 with PBS. The coverslips were then fixed onto glass slides: 2 µl Vectashield mounting media was used  
725 per coverslip and clear nail polish was applied around the edge and allowed to dry completely. The  
726 coverslips were stained and imaged the same day.

727 Images of all samples were obtained using a Leica SP8 confocal microscope, taken with x40  
728 magnification oil objective. Z-stack images through the entire cell were obtained and representative  
729 images were taken from these stacks.

### 730 **Liquid Chromatography coupled to Mass Spectrometry (LC-MS)**

731 Extraction buffer for isolating metabolites: 50% LC-MS grade methanol, 30% LC-MS grade acetonitrile,  
732 20% ultrapure water (internal filtration system), valine-d8 final concentration 5 µM.

733 Hydrophilic interaction chromatographic (HILIC) separation of metabolites was achieved using  
734 a Millipore Sequant ZIC-pHILIC analytical column (5 µm, 2.1 × 150 mm) equipped with a 2.1 × 20 mm  
735 guard column (both 5 mm particle size) with a binary solvent system. Solvent A was 20 mM ammonium  
736 carbonate, 0.05% ammonium hydroxide; Solvent B was acetonitrile. The column oven and  
737 autosampler tray were held at 40 °C and 4 °C, respectively. The chromatographic gradient was run at  
738 a flow rate of 0.200 mL/min as follows: 0–2 min: 80% B; 2–17 min: linear gradient from 80% B to 20%  
739 B; 17–17.1 min: linear gradient from 20% B to 80% B; 17.1–22.5 min: hold at 80% B. Samples were  
740 randomized and analysed with LC–MS in a blinded manner with an injection volume was 5 µl. Pooled



741 samples were generated from an equal mixture of all individual samples and analysed interspersed at  
742 regular intervals within sample sequence as a quality control.

743           Metabolites were measured with a Thermo Scientific Q Exactive Hybrid Quadrupole-Orbitrap  
744 Mass spectrometer (HRMS) coupled to a Dionex Ultimate 3000 UHPLC. The mass spectrometer was  
745 operated in full-scan, polarity-switching mode, with the spray voltage set to +4.5 kV/-3.5 kV, the  
746 heated capillary held at 320 °C, and the auxiliary gas heater held at 280 °C. The sheath gas flow was  
747 set to 25 units, the auxiliary gas flow was set to 15 units, and the sweep gas flow was set to 0 unit.  
748 HRMS data acquisition was performed in a range of  $m/z = 70-900$ , with the resolution set at 70,000,  
749 the AGC target at  $1 \times 10^6$ , and the maximum injection time (Max IT) at 120 ms. Metabolite identities  
750 were confirmed using two parameters: (1) precursor ion  $m/z$  was matched within 5 ppm of theoretical  
751 mass predicted by the chemical formula; (2) the retention time of metabolites was within 5% of the  
752 retention time of a purified standard run with the same chromatographic method. Chromatogram  
753 review and peak area integration were performed using the Thermo Fisher software Tracefinder 5.0  
754 and the peak area for each detected metabolite was normalized against the total ion count (TIC) of  
755 that sample to correct any variations introduced from sample handling through instrument analysis.  
756 The normalized areas were used as variables for further statistical data analysis.

#### 757 **ELISA**

758 For detection of secreted TNF $\alpha$ , IL-6 and IL-10 from BMDMs, supernatants were collected and  
759 cytokines quantified by ELISA according to manufacturers' instructions (R&D Systems or Biolegend),  
760 except antibody and sample volumes were halved.

#### 761 **Nitric oxide (NO) secretion**

762 NO concentrations were quantified by indirect measurement of nitrite (NO $_2^-$ ) via the Griess Reagent  
763 System kit (Promega). The assay was carried out as per manufacturer's instructions and absorbance  
764 of 560 nm was measured.

#### 765 **Reverse Transcription Quantitative PCR (rt-qPCR)**

766 RNA was isolated via High Pure RNA Isolation Kit (Roche) according to the manufacturer's instructions  
767 and RNA was eluted in 50  $\mu$ l water. RNA (minimum 100 ng) was reverse transcribed into  
768 complementary DNA (cDNA) with an M-MLV reverse transcriptase, RNase H minus, point mutant, in  
769 reverse transcriptase buffer, mixed with dNTPs, random hexamer primers and ribonuclease inhibitor  
770 (RNaseOUT). Quantitative PCR was performed using KAPA SYBR $^{\circledR}$  FAST Rox low qPCR Kit Master Mix  
771 in accordance with the instructions provided by the manufacturer, using QuantStudio 3 System  
772 technology. Primers (Table S1) were designed in Primer BLAST and/or were also checked in Primer

773 BLAST for specificity to the gene of interest. Where possible, primers were chosen to cross an exon-  
774 exon junction.

775 RNA expression was normalized to the internal references  $\beta$ -actin and/or TATAbox-binding  
776 protein, from the corresponding sample ( $Ct_{\text{gene}} - Ct_{\text{reference}} = \Delta Ct$ ). Furthermore,  $\Delta Ct$  from control samples  
777 were subtracted from the  $\Delta Ct$  of each sample ( $\Delta Ct_{\text{treatment}} - \Delta Ct_{\text{ctrl}} = \Delta \Delta Ct_{\text{treatment}}$ ). Fold change was  
778 calculated as  $2^{(-\Delta \Delta Ct)}$ . These calculations were carried out using Microsoft Excel.

779  
780  
781

## 782 **Quantification and Statistical Analysis**

783 Data were evaluated on either on Prism version 8 for Windows or via R for Metaboanalyst generated  
784 analysis. Differences between two independent groups were compared via unpaired Student's t-test.  
785 For BCG infection studies where two independent groups were compared at several time points,  
786 multiple t-test analysis was employed, with Holm-Sidak correction for multiple comparisons.  
787 Differences were considered significant at the values of \*  $P < 0.05$ , \*\*  $P < 0.01$ , \*\*\*  $P < 0.001$  and \*\*\*\*  
788  $P < 0.0001$ .

## 789 **Data and Code Availability**

790 All data is available at Mendeley Data DOI: 10.17632/ncbph43m85.1.

791

## 792 **Acknowledgements**

793 The authors would like to thank Dr Gavin McManus for his assistance with the imaging studies.

794 M. Lundahl was funded by a Trinity College Dublin postgraduate studentship and this work is  
795 supported by Science Foundation Ireland (SFI) Research Centre, Advanced Materials and  
796 BioEngineering Research (AMBER) under Grant number 12/RC/2278\_P2 E, SFI under Grant number  
797 12/IA/1421 and 19FFP/6484 (E. Lavelle) and SFI under Grant number 15/CDA/3310 (E. Scanlan). S.  
798 Gordon and M. Mitermite acknowledge funding from Wellcome Trust PhD Studentship  
799 109166/Z/15/A and SFI award 15/IA/3154.

800

## 801 **Author Contributions**

802 M.L.E.L. performed and analyzed all experiments and wrote the paper. M.M., B.S. and S.V.G provided  
803 assistance with BCG infection studies. D.G.R, N.C.W. and L.A.J.O. assisted with Seahorse experiments.  
804 M.Y. identified and quantified the metabolites via LC-MS and D.G.R and C.F. assisted with

805 metabolomics analysis. M.L.E.L., with the assistance of F.L. and A.L.G, developed the BMDM training  
806 protocol. M.L.E.L was supervised by E.M.S. and E.C.L. and the work was supervised by E.C.L.

807

## 808 **Declaration of Interests**

809 The authors declare no competing interests.

810

## 811 **References**

812 Abebe, F. (2012, September). Is interferon-gamma the right marker for bacille Calmette-Guérin-  
813 induced immune protection? The missing link in our understanding of tuberculosis immunology.  
814 *Clinical and Experimental Immunology*. Clin Exp Immunol. [https://doi.org/10.1111/j.1365-](https://doi.org/10.1111/j.1365-2249.2012.04614.x)  
815 [2249.2012.04614.x](https://doi.org/10.1111/j.1365-2249.2012.04614.x)

816 Aira, N., Andersson, A. M., Singh, S. K., McKay, D. M., & Blomgran, R. (2017). Species dependent impact  
817 of helminth-derived antigens on human macrophages infected with Mycobacterium  
818 tuberculosis: Direct effect on the innate anti-mycobacterial response. *PLoS Neglected Tropical*  
819 *Diseases*, 11(2). <https://doi.org/10.1371/journal.pntd.0005390>

820 Amelio, P., Portevin, D., Reither, K., Mhimbira, F., Mpina, M., Tumbo, A., ... Perreau, M. (2017). Mixed  
821 Th1 and Th2 Mycobacterium tuberculosis-specific CD4 T cell responses in patients with active  
822 pulmonary tuberculosis from Tanzania. *PLoS Neglected Tropical Diseases*, 11(7).  
823 <https://doi.org/10.1371/journal.pntd.0005817>

824 Andersen, P., & Kaufmann, S. H. (2014). Novel vaccination strategies against tuberculosis. *Cold Spring*  
825 *Harb Perspect Med*, 4(6). <https://doi.org/10.1101/cshperspect.a018523>

826 Arts, R. J. W., Moorlag, S. J. C. F. M., Novakovic, B., Li, Y., Wang, S. Y., Oosting, M., ... Netea, M. G.  
827 (2018). BCG Vaccination Protects against Experimental Viral Infection in Humans through the  
828 Induction of Cytokines Associated with Trained Immunity. *Cell Host and Microbe*, 23(1), 89-  
829 100.e5. <https://doi.org/10.1016/j.chom.2017.12.010>

830 Beamer, G. L., Flaherty, D. K., Assogba, B. D., Stromberg, P., Gonzalez-Juarrero, M., de Waal Malefyt,  
831 R., ... Turner, J. (2008). Interleukin-10 Promotes Mycobacterium tuberculosis Disease  
832 Progression in CBA/J Mice . *The Journal of Immunology*, 181(8), 5545–5550.  
833 <https://doi.org/10.4049/jimmunol.181.8.5545>

834 Bourigault, M. L., Segueni, N., Rose, S., Court, N., Vacher, R., Vasseur, V., ... Quesniaux, V. F. J. (2013).  
835 Relative contribution of il-1 $\alpha$ , il-1 $\beta$  and tnf to the host response to mycobacterium tuberculosis  
836 and attenuated m. Bovis bcg. *Immunity Inflammation and Disease*, 1(1), 47–62.  
837 <https://doi.org/10.1002/iid3.9>

838 Brown, G. D., & Crocker, P. R. (2016). Lectin Receptors Expressed on Myeloid Cells. *Microbiology*  
839 *Spectrum*, 4(5). <https://doi.org/10.1128/microbiolspec.MCHD-0036-2016>

840 Bystrom, J., Evans, I., Newson, J., Stables, M., Toor, I., van Rooijen, N., ... Gilroy, D. W. (2008).  
841 Resolution-phase macrophages possess a unique inflammatory phenotype that is controlled by  
842 cAMP. *Blood*, 112(10), 4117–4127. <https://doi.org/10.1182/blood-2007-12-129767>

843 Chatterjee, S., Talaat, K. R., van Seventer, E. E., Feng, C. G., Scott, A. L., Jedlicka, A., ... Nutman, T. B.  
844 (2017). Mycobacteria induce TPL-2 mediated IL-10 in IL-4-generated alternatively activated  
845 macrophages. *PLoS ONE*, 12(6). <https://doi.org/10.1371/journal.pone.0179701>

- 846 Cheng, S.-C., Quintin, J., Cramer, R. A., Shepardson, K. M., Saeed, S., Kumar, V., ... Netea, M. G. (2014).  
847 mTOR- and HIF-1 $\alpha$ -mediated aerobic glycolysis as metabolic basis for trained immunity. *Science*  
848 (*New York, N.Y.*), 345(6204), 1250684. <https://doi.org/10.1126/science.1250684>
- 849 Choreño-Parra, J. A., Weinstein, L. I., Yunis, E. J., Zúñiga, J., & Hernández-Pando, R. (2020, February  
850 14). Thinking Outside the Box: Innate- and B Cell-Memory Responses as Novel Protective  
851 Mechanisms Against Tuberculosis. *Frontiers in Immunology*. Frontiers Media S.A.  
852 <https://doi.org/10.3389/fimmu.2020.00226>
- 853 Cohen, S. B., Gern, B. H., Delahaye, J. L., Adams, K. N., Plumlee, C. R., Winkler, J. K., ... Urdahl, K. B.  
854 (2018). Alveolar Macrophages Provide an Early Mycobacterium tuberculosis Niche and Initiate  
855 Dissemination. *Cell Host & Microbe*, 24(3), 439–446.  
856 <https://doi.org/10.1016/j.chom.2018.08.001>
- 857 Cumming, B. M., Addicott, K. W., Adamson, J. H., & Steyn, A. J. C. (2018). Mycobacterium tuberculosis  
858 induces decelerated bioenergetic metabolism in human macrophages. *ELife*, 7.  
859 <https://doi.org/10.7554/eLife.39169>
- 860 Ferrante, C. J., & Leibovich, S. J. (2012). Regulation of Macrophage Polarization and Wound Healing.  
861 In *Adv Wound Care (New Rochelle)* (Vol. 1, pp. 10–16). Department of Cell Biology and Molecular  
862 Medicine and The Cardiovascular Research Institute, New Jersey Medical School, University of  
863 Medicine and Dentistry of New Jersey , Newark, New Jersey.  
864 <https://doi.org/10.1089/wound.2011.0307>
- 865 Flynn, J. L., Chan, J., Triebold, K. J., Dalton, D. K., Stewart, T. A., & Bloom, B. R. (1993). An essential role  
866 for interferon gamma in resistance to Mycobacterium tuberculosis infection. *J Exp Med*, 178(6),  
867 2249–2254.
- 868 Gabrilovich, D. I., Ostrand-Rosenberg, S., & Bronte, V. (2012). Coordinated regulation of myeloid cells  
869 by tumours. *Nature Reviews Immunology*, 12(4), 253–268. <https://doi.org/10.1038/nri3175>
- 870 Gause, W. C., Wynn, T. A., & Allen, J. E. (2013, August 5). Type 2 immunity and wound healing:  
871 Evolutionary refinement of adaptive immunity by helminths. *Nature Reviews Immunology*.  
872 Nature Publishing Group. <https://doi.org/10.1038/nri3476>
- 873 Gleeson, L. E., Sheedy, F. J., Palsson-McDermott, E. M., Triglia, D., O’Leary, S. M., O’Sullivan, M. P., ...  
874 Keane, J. (2016). Cutting Edge: Mycobacterium tuberculosis Induces Aerobic Glycolysis in Human  
875 Alveolar Macrophages That Is Required for Control of Intracellular Bacillary Replication . *The*  
876 *Journal of Immunology*, 196(6), 2444–2449. <https://doi.org/10.4049/jimmunol.1501612>
- 877 Gordon, S., & Martinez, F. O. (2010). Alternative activation of macrophages: mechanism and functions.  
878 *Immunity*, 32(5), 593–604. <https://doi.org/10.1016/j.immuni.2010.05.007>
- 879 Hackett, E. E., Charles-Messance, H., O’Leary, S. M., Gleeson, L. E., Muñoz-Wolf, N., Case, S., ... Sheedy,  
880 F. J. (2020). Mycobacterium tuberculosis Limits Host Glycolysis and IL-1 $\beta$  by Restriction of PFK-M  
881 via MicroRNA-21. *Cell Reports*, 30(1), 124-136.e4. <https://doi.org/10.1016/j.celrep.2019.12.015>
- 882 Huang, L., Nazarova, E. V., & Russell, D. G. (2019). Mycobacterium tuberculosis: Bacterial Fitness within  
883 the Host Macrophage. In *Bacteria and Intracellularly* (Vol. 7, pp. 127–138). American Society of  
884 Microbiology. <https://doi.org/10.1128/microbiolspec.bai-0001-2019>
- 885 Huang, L., Nazarova, E. V., Tan, S., Liu, Y., & Russell, D. G. (2018). Growth of Mycobacterium  
886 tuberculosis in vivo segregates with host macrophage metabolism and ontogeny. *Journal of*  
887 *Experimental Medicine*, 215(4), 1135–1152. <https://doi.org/10.1084/jem.20172020>
- 888 Jouanguy, E., Lamhamedi-Cherradi, S., Lammas, D., Dorman, S. E., Fondanèche, M. C., Dupuis, S., ...  
889 Casanova, J. L. (1999). A human IFNGR1 small deletion hotspot associated with dominant  
890 susceptibility to mycobacterial infection. *Nature Genetics*, 21(4), 370–378.  
891 <https://doi.org/10.1038/7701>

- 892 Kahnert, A., Seiler, P., Stein, M., Bandermann, S., Hahnke, K., Mollenkopf, H., & Kaufmann, S. H. E.  
893 (2006). Alternative activation deprives macrophages of a coordinated defense program to  
894 Mycobacterium tuberculosis. *European Journal of Immunology*, 36(3), 631–647.  
895 <https://doi.org/10.1002/eji.200535496>
- 896 Keane, J., Gershon, S., Wise, R. P., Mirabile-Levens, E., Kasznica, J., Schwieterman, W. D., ... Braun, M.  
897 M. (2001). Tuberculosis Associated with Infliximab, a Tumor Necrosis Factor  $\alpha$ -Neutralizing  
898 Agent. *New England Journal of Medicine*, 345(15), 1098–1104.  
899 <https://doi.org/10.1056/nejmoa011110>
- 900 Khader, S. A., Divangahi, M., Hanekom, W., Hill, P. C., Maeurer, M., Makar, K. W., ... Bill and Melinda  
901 Gates Foundation Collaboration for TB Vaccine Discovery Innate Immunity Working Group18.  
902 (2019). Targeting innate immunity for tuberculosis vaccination. *Journal of Clinical Investigation*,  
903 129(9), 3482–3491. <https://doi.org/10.1172/JCI128877>
- 904 Khan, A., Singh, V. K., Hunter, R. L., & Jagannath, C. (2019, August 1). Macrophage heterogeneity and  
905 plasticity in tuberculosis. *Journal of Leukocyte Biology*. John Wiley and Sons Inc.  
906 <https://doi.org/10.1002/JLB.MR0318-095RR>
- 907 Khan, N., Downey, J., Sanz, J., Kaufmann, E., Blankenhaus, B., Pacis, A., ... Divangahi, M. (2020). M.  
908 tuberculosis Reprograms Hematopoietic Stem Cells to Limit Myelopoiesis and Impair Trained  
909 Immunity. *Cell*, 183(3), 752-770.e22. <https://doi.org/10.1016/j.cell.2020.09.062>
- 910 Kleinnijenhuis, J., Quintin, J., Preijers, F., Joosten, L. A. B., Ifrim, D. C., Saeed, S., ... Netea, M. G. (2012).  
911 Bacille Calmette-Guerin induces NOD2-dependent nonspecific protection from reinfection via  
912 epigenetic reprogramming of monocytes. *Proceedings of the National Academy of Sciences of  
913 the United States of America*, 109(43), 17537–17542. <https://doi.org/10.1073/pnas.1202870109>
- 914 Lebre, F., Hanlon, D., Boland, J. B., Coleman, J., & Lavelle, E. C. (2018). Exfoliation in Endotoxin-Free  
915 Albumin Generates Pristine Graphene with Reduced Inflammatory Properties. *Advanced  
916 Biosystems*, 2(12), 1800102 (1-15). <https://doi.org/10.1002/adbi.201800102>
- 917 Li, L., Ng, D. S. W., Mah, W. C., Almeida, F. F., Rahmat, S. A., Rao, V. K., ... Lane, D. P. (2015). A unique  
918 role for p53 in the regulation of M2 macrophage polarization. *Cell Death and Differentiation*,  
919 22(7), 1081–1093. <https://doi.org/10.1038/cdd.2014.212>
- 920 Li, X. X., & Zhou, X. N. (2013). Co-infection of tuberculosis and parasitic diseases in humans: A  
921 systematic review. *Parasites and Vectors*. Parasit Vectors. [https://doi.org/10.1186/1756-3305-](https://doi.org/10.1186/1756-3305-6-79)  
922 6-79
- 923 Liu, L., Lu, Y., Martinez, J., Bi, Y., Lian, G., Wang, T., ... Wang, R. (2016). Proinflammatory signal  
924 suppresses proliferation and shifts macrophage metabolism from Myc-dependent to HIF1 $\alpha$ -  
925 dependent. *Proceedings of the National Academy of Sciences of the United States of America*,  
926 113(6), 1564–1569. <https://doi.org/10.1073/pnas.1518000113>
- 927 Luiz, J. P. M., Toller-Kawahisa, J. E., Viacava, P. R., Nascimento, D. C., Pereira, P. T., Saraiva, A. L., ...  
928 Alves-Filho, J. C. (2020). MEK5/ERK5 signaling mediates IL-4-induced M2 macrophage  
929 differentiation through regulation of c-Myc expression. *Journal of Leukocyte Biology*, 108(4),  
930 1215–1223. <https://doi.org/10.1002/JLB.1MA0520-016R>
- 931 Lundahl, M. L. E., Scanlan, E. M., & Lavelle, E. C. (2017). Therapeutic potential of carbohydrates as  
932 regulators of macrophage activation. *Biochemical Pharmacology*, 146, 23–41.  
933 <https://doi.org/10.1016/j.bcp.2017.09.003>
- 934 Lundahl, M., Lynch, D. M., Barnes, D., McSweeney, L., Gorman, A., Lebre, F., ... Scanlan, E. M. (2020).  
935 Mycobacterial para-Hydroxybenzoic Acid-Derivatives (pHBADs) and Related Structures Induce  
936 Macrophage Innate Memory. *ACS Chemical Biology*, 15(9), 2415–2421.  
937 <https://doi.org/10.1021/acscchembio.0c00378>

- 938 Mabbott, N. A. (2018). The Influence of Parasite Infections on Host Immunity to Co-infection With  
939 Other Pathogens. *Frontiers in Immunology*. NLM (Medline).  
940 <https://doi.org/10.3389/fimmu.2018.02579>
- 941 Mantovani, A., Sica, A., Sozzani, S., Allavena, P., Vecchi, A., & Locati, M. (2004). The chemokine system  
942 in diverse forms of macrophage activation and polarization. *Trends Immunol*, 25(12), 677–686.  
943 <https://doi.org/10.1016/j.it.2004.09.015>
- 944 Monin, L., Griffiths, K. L., Lam, W. Y., Gopal, R., Kang, D. D., Ahmed, M., ... Khader, S. A. (2015).  
945 Helminth-induced arginase-1 exacerbates lung inflammation and disease severity in  
946 tuberculosis. *Journal of Clinical Investigation*, 125(12), 4699–4713.  
947 <https://doi.org/10.1172/JCI77378>
- 948 Moorlag, S. J. C. F. M., Khan, N., Novakovic, B., Kaufmann, E., Jansen, T., van Crevel, R., ... Netea, M. G.  
949 (2020).  $\beta$ -Glucan Induces Protective Trained Immunity against Mycobacterium tuberculosis  
950 Infection: A Key Role for IL-1. *Cell Reports*, 31(7). <https://doi.org/10.1016/j.celrep.2020.107634>
- 951 Moreira-Teixeira, L., Sousa, J., McNab, F. W., Torrado, E., Cardoso, F., Machado, H., ... Saraiva, M.  
952 (2016). Type I IFN Inhibits Alternative Macrophage Activation during Mycobacterium  
953 tuberculosis Infection and Leads to Enhanced Protection in the Absence of IFN- $\gamma$  Signaling.  
954 *Journal of Immunology (Baltimore, Md. : 1950)*, 197(12), 4714–4726.  
955 <https://doi.org/10.4049/jimmunol.1600584>
- 956 Murray, P. J., & Wynn, T. A. (2011). Protective and pathogenic functions of macrophage subsets.  
957 *Nature Reviews Immunology*, 11(11), 723–737. <https://doi.org/10.1038/nri3073>
- 958 O’Leary, S., O’Sullivan, M. P., & Keane, J. (2011). IL-10 blocks phagosome maturation in mycobacterium  
959 tuberculosis-infected human macrophages. *Am J Respir Cell Mol Biol*, 45(1), 172–180.  
960 <https://doi.org/10.1165/rcmb.2010-0319OC>
- 961 O’Neill, L. A. J., Kishton, R. J., & Rathmell, J. (2016). A guide to immunometabolism for immunologists.  
962 *Nature Reviews Immunology* 2016 16:9, 16(9), 553–565. <https://doi.org/10.1038/NRI.2016.70>
- 963 O’Shea, M. K., Fletcher, T. E., Muller, J., Tanner, R., Matsumiya, M., Bailey, J. W., ... McShane, H. (2018).  
964 Human Hookworm Infection Enhances Mycobacterial Growth Inhibition and Associates With  
965 Reduced Risk of Tuberculosis Infection. *Frontiers in Immunology*, 9, 2893.  
966 <https://doi.org/10.3389/fimmu.2018.02893>
- 967 Orecchioni, M., Ghosheh, Y., Pramod, A. B., & Ley, K. (2019). Macrophage Polarization: Different Gene  
968 Signatures in M1(LPS+) vs. Classically and M2(LPS-) vs. Alternatively Activated Macrophages.  
969 *Frontiers in Immunology*, 10, 1084 (1-14). <https://doi.org/10.3389/fimmu.2019.01084>
- 970 Ottenhoff, T. H. M., Doherty, T. M., Van Dissel, J. T., Bang, P., Lingnau, K., Kromann, I., & Andersen, P.  
971 (2010, December). First in humans: A new molecularly defined vaccine shows excellent safety  
972 and strong induction of long-lived Mycobacterium tuberculosis-specific Th1-cell like responses.  
973 *Human Vaccines*. Hum Vaccin. <https://doi.org/10.4161/hv.6.12.13143>
- 974 Palsson-McDermott, E. M., Curtis, A. M., Goel, G., Lauterbach, M. A. R., Sheedy, F. J., Gleeson, L. E., ...  
975 O’Neill, L. A. J. (2015). Pyruvate Kinase M2 Regulates Hif-1 $\alpha$  Activity and IL-1 $\beta$  Induction and Is a  
976 Critical Determinant of the Warburg Effect in LPS-Activated Macrophages. *Cell Metabolism*,  
977 21(1), 65–80. <https://doi.org/10.1016/j.cmet.2014.12.005>
- 978 Pasula, R., Martin, W. J., Kesavalu, B. R., Abdalla, M. Y., & Britigan, B. E. (2017). Passive transfer of  
979 interferon- $\gamma$  over-expressing macrophages enhances resistance of SCID mice to Mycobacterium  
980 tuberculosis infection. *Cytokine*, 95, 70–79. <https://doi.org/10.1016/j.cyto.2017.02.009>
- 981 Philips, J. A., & Ernst, J. D. (2012). Tuberculosis pathogenesis and immunity. *Annu Rev Pathol*, 7, 353–  
982 384. <https://doi.org/10.1146/annurev-pathol-011811-132458>

- 983 Potian, J. A., Rafi, W., Bhatt, K., McBride, A., Gause, W. C., & Salgame, P. (2011). Preexisting helminth  
984 infection induces inhibition of innate pulmonary anti-tuberculosis defense by engaging the IL-4  
985 receptor pathway. *Journal of Experimental Medicine*, 208(9), 1863–1874.  
986 <https://doi.org/10.1084/jem.20091473>
- 987 Quinn, S. M., Cunningham, K., Raverdeau, M., Walsh, R. J., Curham, L., Malara, A., & Mills, K. H. G.  
988 (2019). Anti-inflammatory trained immunity mediated by helminth products attenuates the  
989 induction of T cell-mediated autoimmune disease. *Frontiers in Immunology*, 10(MAY).  
990 <https://doi.org/10.3389/fimmu.2019.01109>
- 991 Quintin, J., Saeed, S., Martens, J. H. A., Giamarellos-Bourboulis, E. J., Ifrim, D. C., Logie, C., ... Netea, M.  
992 G. (2012). *Candida albicans* infection affords protection against reinfection via functional  
993 reprogramming of monocytes. *Cell Host & Microbe*, 12(2), 223–232.  
994 <https://doi.org/10.1016/j.chom.2012.06.006>
- 995 Roy, S., Mukhopadhyay, D., Mukherjee, S., Moulik, S., Chatterji, S., Brahme, N., ... Chatterjee, M.  
996 (2018). An IL-10 dominant polarization of monocytes is a feature of Indian Visceral Leishmaniasis.  
997 *Parasite Immunology*, 40(7). <https://doi.org/10.1111/pim.12535>
- 998 Ryndak, M. B., & Laal, S. (2019). Mycobacterium tuberculosis Primary Infection and Dissemination: A  
999 Critical Role for Alveolar Epithelial Cells. *Frontiers in Cellular and Infection Microbiology*, 9, 299.  
1000 <https://doi.org/10.3389/fcimb.2019.00299>
- 1001 Saeed, S., Quintin, J., Kerstens, H. H. D., Rao, N. A., Aghajani-refah, A., Matarese, F., ... Stunnenberg, H.  
1002 G. (2014). Epigenetic programming of monocyte-to-macrophage differentiation and trained  
1003 innate immunity. *Science (New York, N.Y.)*, 345(6204), 1251086.  
1004 <https://doi.org/10.1126/science.1251086>
- 1005 Salgame, P., Yap, G. S., & Gause, W. C. (2013). Effect of helminth-induced immunity on infections with  
1006 microbial pathogens. *Nature Immunology*. Nat Immunol. <https://doi.org/10.1038/ni.2736>
- 1007 Seth, P., Csizmadia, E., Hedblom, A., Vuerich, M., XIE, H., Li, M., ... Wegiel, B. (2017). Deletion of lactate  
1008 dehydrogenase-A in myeloid cells triggers antitumor immunity. *Cancer Research*,  
1009 canres.2938.2016. <https://doi.org/10.1158/0008-5472.CAN-16-2938>
- 1010 Shi, L., Jiang, Q., Bushkin, Y., Subbian, S., & Tyagi, S. (2019). Biphasic dynamics of macrophage  
1011 immunometabolism during Mycobacterium tuberculosis infection. *MBio*, 10(2).  
1012 <https://doi.org/10.1128/mBio.02550-18>
- 1013 Sica, A., Erreni, M., Allavena, P., & Porta, C. (2015). Macrophage polarization in pathology. *Cellular and*  
1014 *Molecular Life Sciences*, 72(21), 4111–4126. <https://doi.org/10.1007/s00018-015-1995-y>
- 1015 Van den Bossche, J., Baardman, J., Otto, N. A., van der Velden, S., Neele, A. E., van den Berg, S. M., ...  
1016 de Winther, M. P. J. (2016). Mitochondrial Dysfunction Prevents Repolarization of Inflammatory  
1017 Macrophages. *Cell Reports*, 17(3), 684–696. <https://doi.org/10.1016/j.celrep.2016.09.008>
- 1018 Van den Bossche, J., O'Neill, L. A., & Menon, D. (2017). Macrophage Immunometabolism: Where Are  
1019 We (Going)? *Trends in Immunology*. <https://doi.org/10.1016/j.it.2017.03.001>
- 1020 van der Meer, J. W. M., Joosten, L. A. B., Riksen, N., & Netea, M. G. (2015). Trained immunity: A smart  
1021 way to enhance innate immune defence. *Molecular Immunology*, 68(1), 40–44.  
1022 <https://doi.org/10.1016/j.molimm.2015.06.019>
- 1023 Viola, A., Munari, F., Sánchez-Rodríguez, R., Scolaro, T., & Castegna, A. (2019). The metabolic signature  
1024 of macrophage responses. *Frontiers in Immunology*, 10(JULY).  
1025 <https://doi.org/10.3389/fimmu.2019.01462>
- 1026 Wang, F., Zhang, S., Vuckovic, I., Jeon, R., Lerman, A., Folmes, C. D., ... Herrmann, J. (2018). Glycolytic  
1027 Stimulation Is Not a Requirement for M2 Macrophage Differentiation. *Cell Metabolism*, 28(3),

1028 463-475.e4. <https://doi.org/10.1016/j.cmet.2018.08.012>

1029 WHO. (2019). *Global Tuberculosis Report: Executive Summary 2019*.  
1030 <https://doi.org/WHO/CDS/TB/2019.23>

1031

1032

1033

1034

1035

1036

1037

1038

1039

1040

1041



1042 **Supplemental Information**

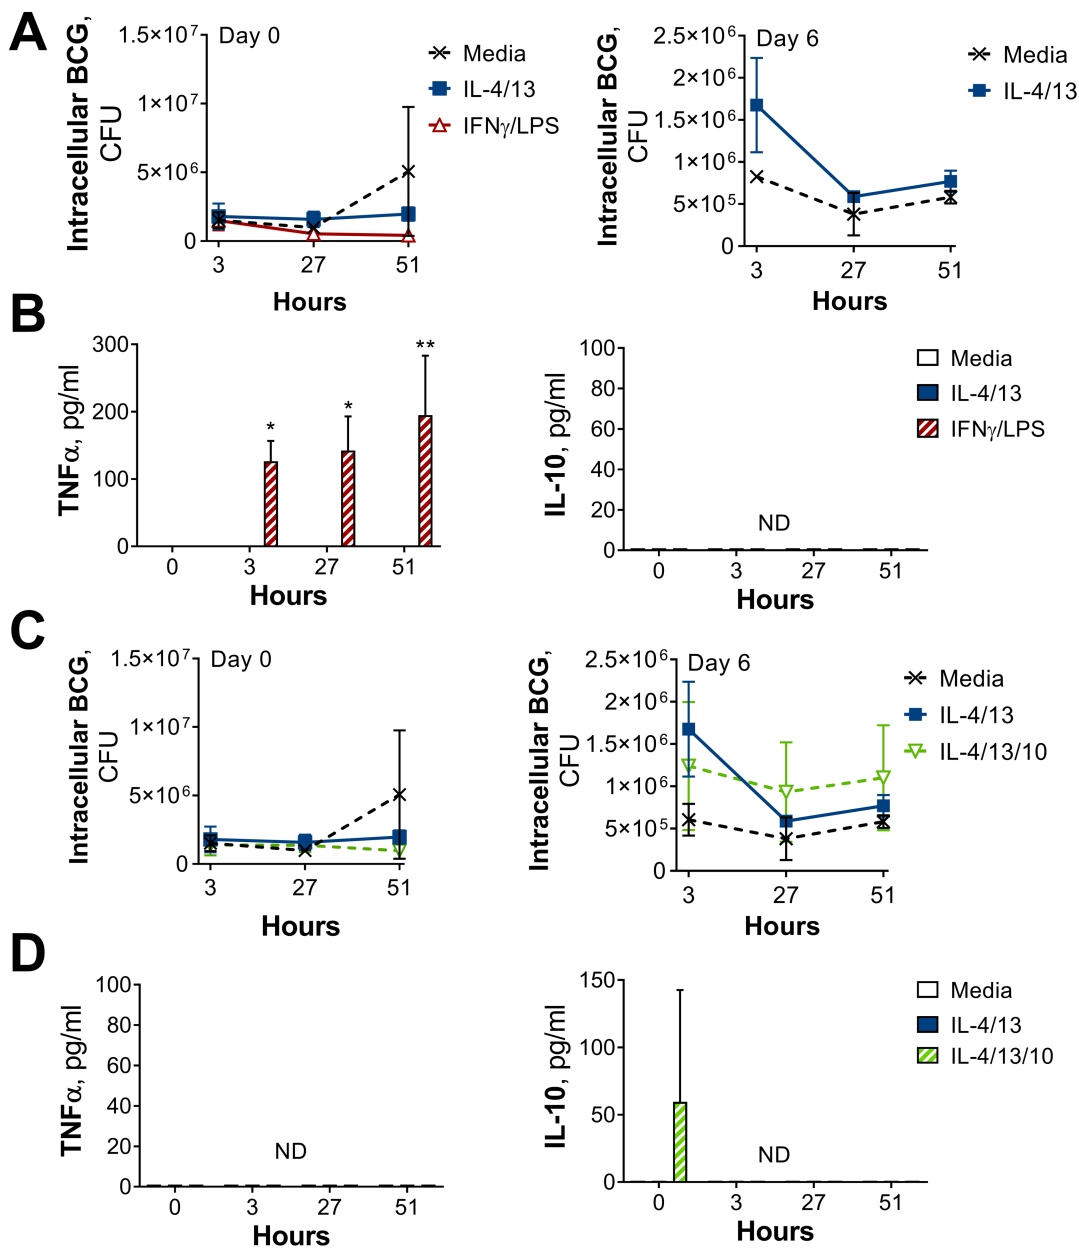

1043

1044 **Figure S1. CFU counts and cytokine secretion from BCG killing experiments.**

1045 (A-B) BCG Denmark CFU counts (A) and cytokine secretion (B) on Day 0 or Day 6 after h following BMDM BCG  
 1046 infection. BMDMs were previously incubated with media control, IL-4 with IL-13 or IFN $\gamma$  with LPS for 24 h on Day  
 1047 -1. Representative results (n = 2), standardized to  $0.5 \times 10^6$  cells, shown as mean  $\pm$  SEM (A-B) and analyzed by  
 1048 multiple t-test, with Holm-Sidak correction, compared with media control (B). (C-D) BCG Denmark CFU counts  
 1049 (C) and cytokine secretion (D) on Day 0 or Day 6 after h following BMDM BCG infection. BMDMs were previously  
 1050 incubated with media control or IL-4 and IL-13, with or without IL-10, for 24 h on Day -1. Representative results  
 1051 (n = 2), standardized to  $0.5 \times 10^6$  cells, shown as mean  $\pm$  SEM (C-D) and analyzed by multiple t-test, with Holm-  
 1052 Sidak correction, compared with media control (D). \* p  $\leq$  0.05, \*\* p  $\leq$  0.01.  
 1053

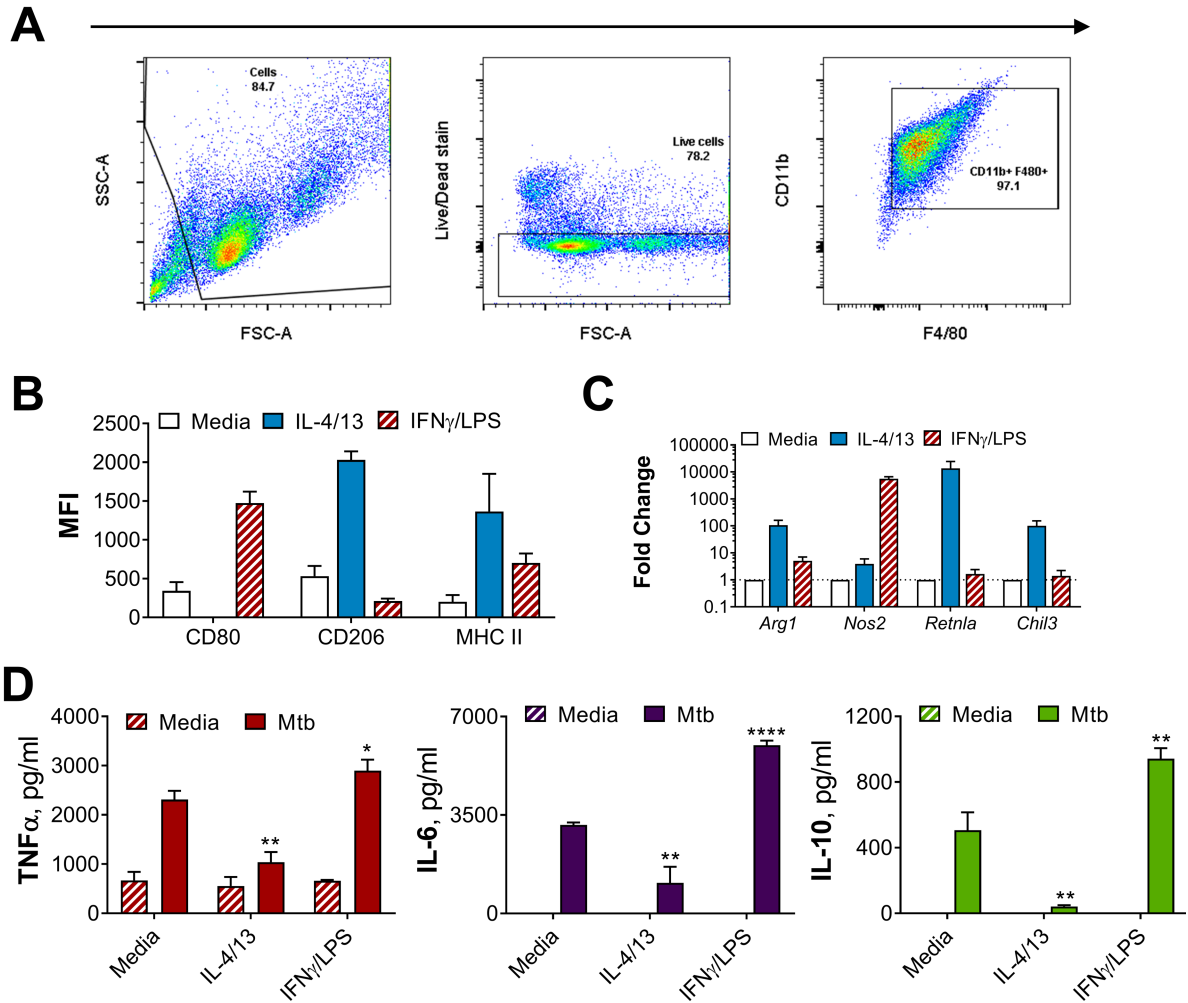

1054

1055 **Figure S2. BMDMs either classically activated with IFN $\gamma$  and LPS or alternatively activated with IL-4**  
 1056 **and IL-13.**

1057 **(A)** Gating strategy for flow cytometry analysis, gating on cells, live cells and CD11b+ F480+ BMDMs. **(B)** Surface  
 1058 marker expression of CD80, CD206 and MHC II on BMDMs incubated with media as a control, IL-4 with IL-13 or  
 1059 IFN $\gamma$  with LPS for 24 h (n = 3). **(C)** qPCR of indicated mRNA in BMDMs treated as in (B), standardized to media  
 1060 control (n = 4). **(D)** Cytokine secretion from BMDMs incubated with media, IL-4 with IL-13 or IFN $\gamma$  with LPS for  
 1061 24 h on Day -1 and stimulated with media or irradiated *M. tuberculosis* H37Rv (Mtb) for 24 h on Day 6 (n = 3).  
 1062 Mean  $\pm$  SD are shown and analyzed by student's t-test, compared to media control. \* p  $\leq$  0.05, \*\* p  $\leq$  0.01, \*\*\*  
 1063 p  $\leq$  0.001, \*\*\*\* p  $\leq$  0.0001.  
 1064

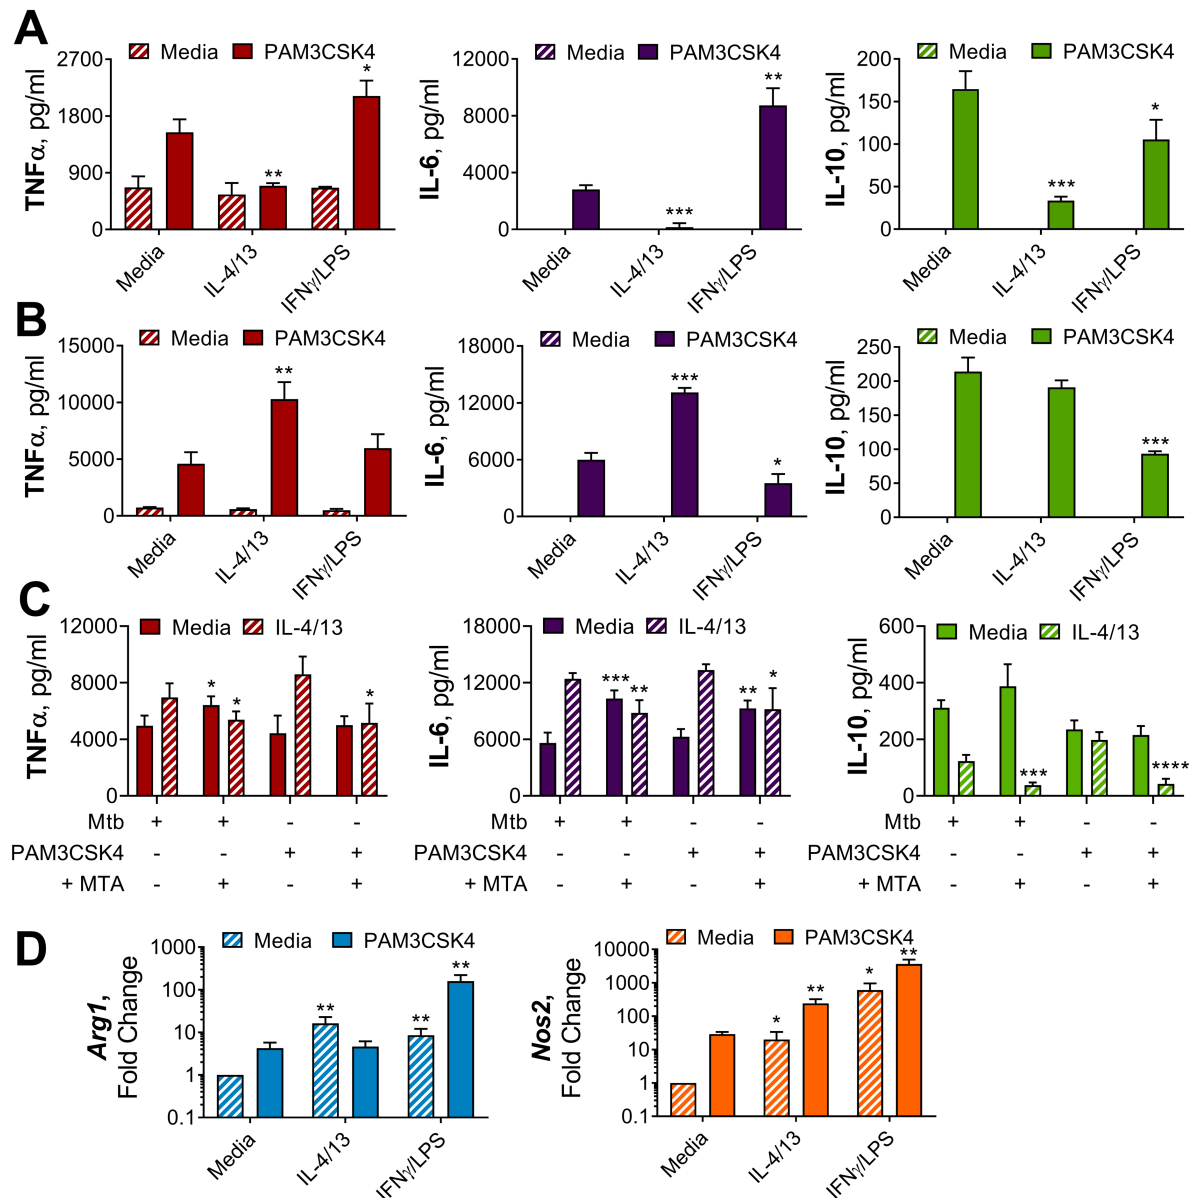

1065

1066 **Figure S3. Methylation contributes to IL-4 and IL-13 innate training, which enhances inflammatory**  
 1067 **and bactericidal responses following TLR 1/2 and mycobacterial stimulation**

1068 (A-B) Cytokine secretion from BMDMs following incubation with media control, IL-4 with IL-13 or IFN $\gamma$  with LPS  
 1069 for 24 h on Day -1 and incubated with media or PAM3CSK4 on Day 0 (A) or Day 6 (B) for 24 hours (n = 3). (C)  
 1070 Cytokine secretion following BMDM incubation with media control or IL-4 with IL-13 for 24 h on Day -1, with or  
 1071 without 1 hour pre-incubation with methylation inhibitor MTA, and incubation with irradiated *M. tuberculosis*  
 1072 H37Rv (Mtb) or PAM3CSK4 for 24 h on Day 6 (n = 4). (D) qPCR of indicated mRNA in BMDMs treated as in (B),  
 1073 standardized to BMDMs incubated with media Day -1 and Day 6 (n = 4). Mean  $\pm$  SD are shown and analyzed by  
 1074 student's t-test, compared with media control (A-B, D) or comparing with or without MTA (C). \* p  $\leq$  0.05, \*\* p  
 1075  $\leq$  0.01, \*\*\* p  $\leq$  0.001, \*\*\*\* p  $\leq$  0.0001.  
 1076

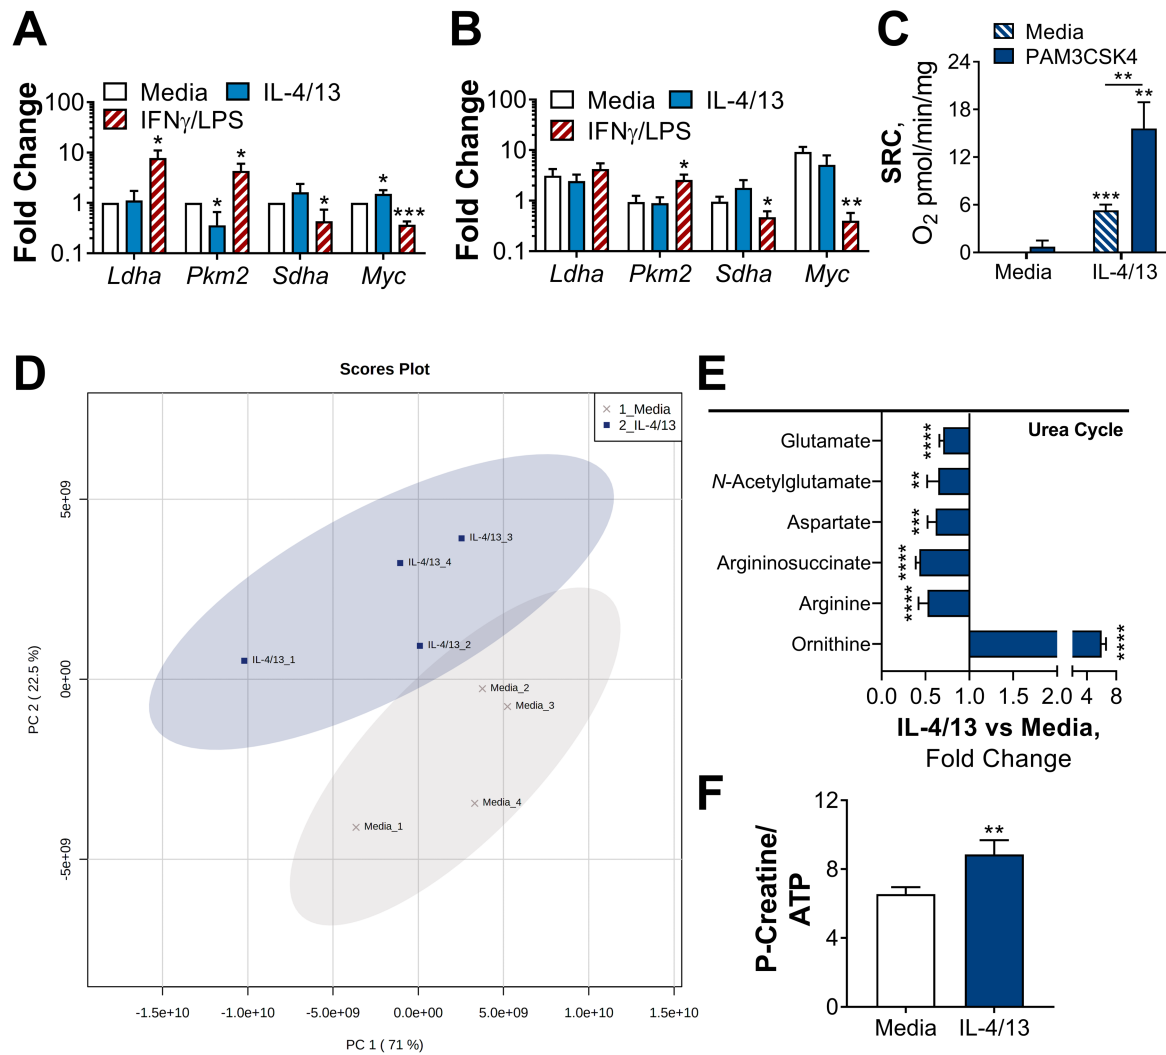

1077

1078 **Figure S4. Challenged BMDMs previously trained with IL-4 and IL-13 retain M2-typical metabolism.**

1079 (A-B) qPCR of indicated mRNA in BMDMs following incubation with media control, IL-4 with IL-13 or IFN $\gamma$  with  
 1080 LPS on for 24 h Day -1 and stimulated with media (A) or PAM3CSK4 (B) on Day 6 for 6 h (*Pkm2*) and 24 h (*Ldha*,  
 1081 *Sdha* and *Myc*). Fold change was standardized to BMDMs incubated with media Day -1 and Day 6 (n = 3). (C)  
 1082 Spare respiratory capacity (SRC) of BMDMs treated as in (A-B), with incubation of media or IL-4 with IL-13 on  
 1083 Day -1 (n = 3). (D-F) Metabolites isolated from BMDMs following incubation with either media control  
 1084 (untrained) or IL-4 with IL-13 (trained) for 24 h on Day -1 and stimulation with Mtb for 24 h on Day 6 (n = 4).  
 1085 Metaboanalyst principal component analysis (PCA) (D), fold change of metabolites from trained BMDMs  
 1086 compared with media control (=1) (E) and calculated ratio of phosphocreatine (P-creatine) to ATP (F) are shown.  
 1087 Mean  $\pm$  SD are shown and analyzed by student t-test, compared with media control. \* p  $\leq$  0.05, \*\* p  $\leq$  0.01, \*\*\*  
 1088 p  $\leq$  0.001, \*\*\*\* p  $\leq$  0.0001.  
 1089

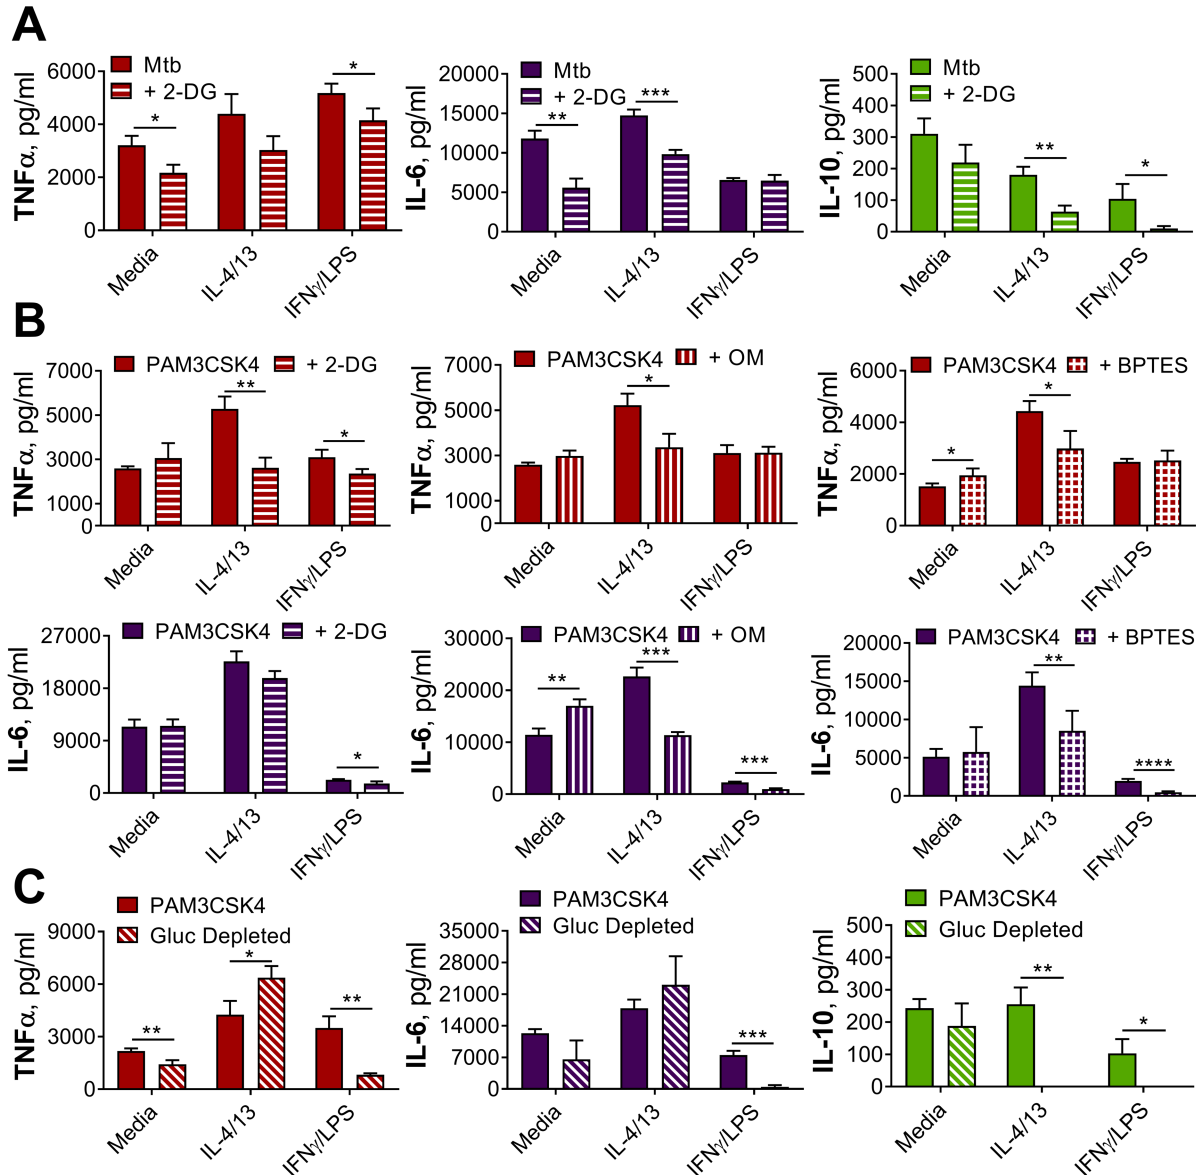

1090

1091 **Figure S5. Innate training with IL-4 and IL-13 enhancement of pro-inflammatory responses is not**  
 1092 **dependent upon glucose metabolism.**

1093 (A-B) Cytokine secretion from BMDMs following incubation with media control, IL-4 with IL-13 or IFN $\gamma$  with LPS  
 1094 for 24 h on Day -1 and incubation with irradiated *M. tuberculosis* H37Rv (Mtb) (A) or PAM3CSK4 (B) for 24 h on  
 1095 Day 6, with or without pre-incubation of metabolic inhibitors oligomycin (OM), 2-deoxy glucose (2-DG) or BPTES.  
 1096 (C) Cytokine secretion from BMDMs following incubation with media control, IL-4 with IL-13 or IFN $\gamma$  with LPS for  
 1097 24 h on Day -1 and incubation with media or PAM3CSK4 for 24 h on Day 6, with or without glucose depleted  
 1098 conditions between Day -1 to 7. Mean  $\pm$  SD (n = 3-4) are shown and analyzed by student's t-test as indicated. \*  
 1099  $p \leq 0.05$ , \*\*  $p \leq 0.01$ , \*\*\*  $p \leq 0.001$ , \*\*\*\*  $p \leq 0.0001$ .

1100

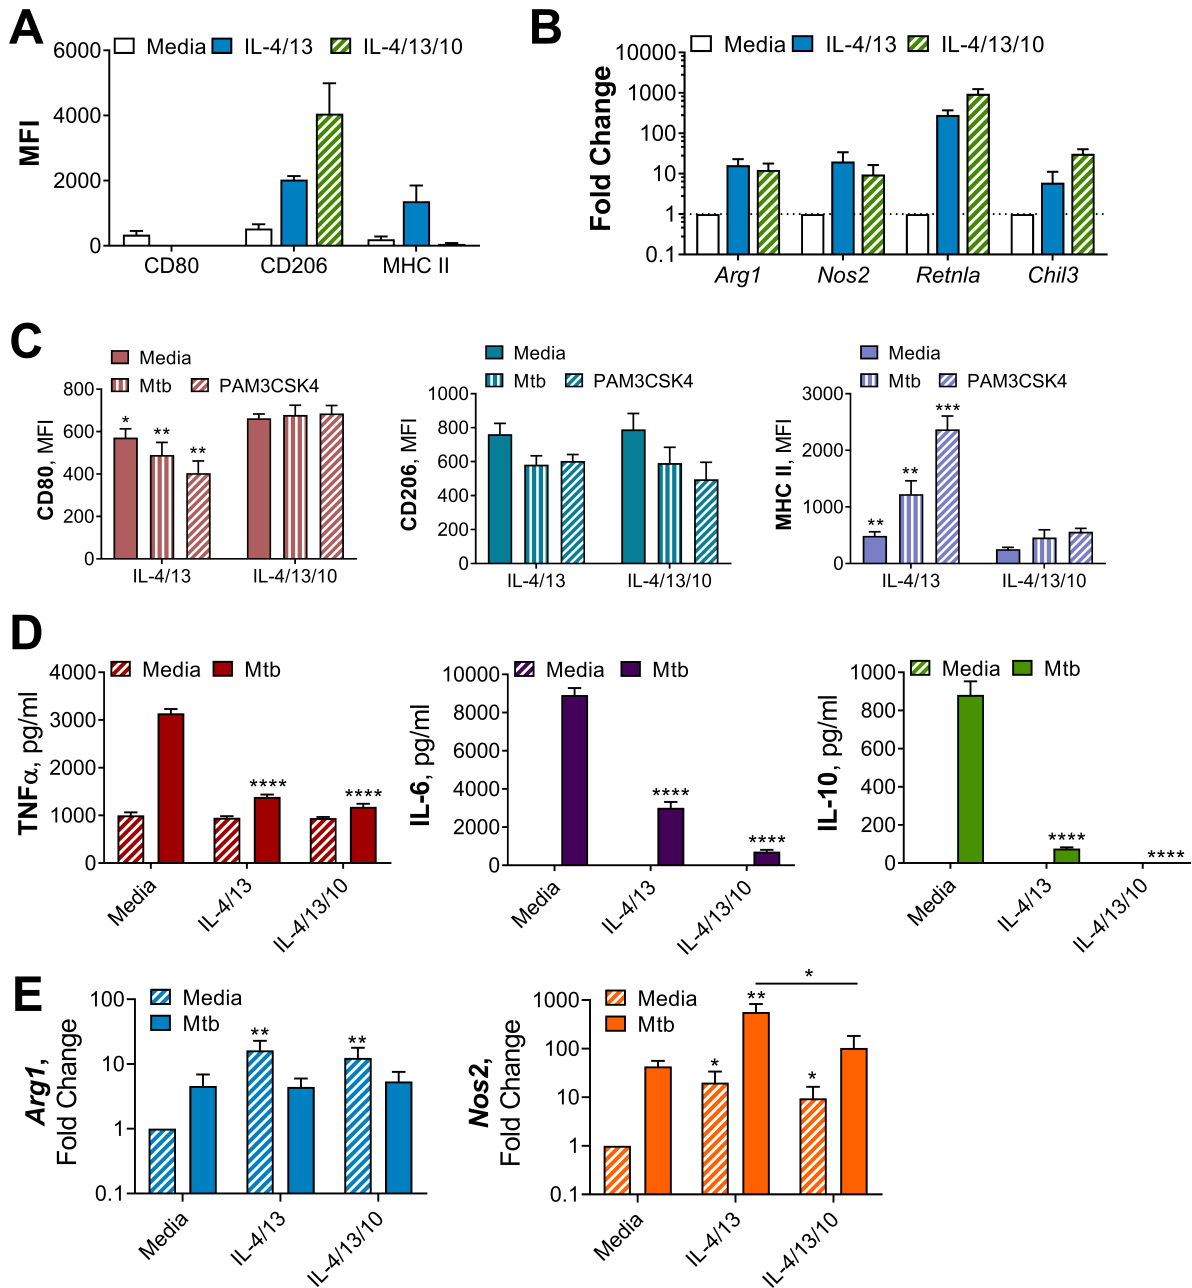

1101

1102 **Figure S6. Alternative macrophage activation with or without IL-10.**

1103 (A) Surface marker expression of CD80, CD206 and MHC II on BMDMs incubated with media as a control or IL-4  
 1104 and IL-13, with or without IL-10, for 24 h (n = 3) (gating strategy shown Figure S2A). (B) qPCR of indicated mRNA  
 1105 in BMDMs treated as in (A), standardized to media control (n = 4). (C) Surface marker expression of CD80, CD206  
 1106 and MHC II on BMDMs following incubation with IL-4 and IL-13, with or without IL-10, for 24 h on Day -1 and  
 1107 incubated with media, irradiated *M. tuberculosis* H37Rv (Mtb) or PAM3CSK4 for 24 h on Day 0 (n = 3). (D)  
 1108 Cytokine secretion from BMDMs treated as in (C), incubated with media or Mtb for 24 h on Day 0 (n = 4). Mean  
 1109 ± SD (n = 4) are shown and analyzed by student t-test, compared with media control. (E) qPCR of indicated  
 1110 mRNA in BMDMs treated as in (C), incubated with media or Mtb for 24 h on Day 0, standardized to BMDM  
 1111 incubated with media on Day -1 and Day 0 (n = 4). Mean ± SD (n = 4) are shown (A-E) and analyzed by student's  
 1112 t-test, compared with media control (D-E), comparing with or without IL-10 (C, E). \* p ≤ 0.05, \*\* p ≤ 0.01, \*\*\* p  
 1113 ≤ 0.001, \*\*\*\* p ≤ 0.0001.

1114

1115

1116 **Table S 1. Primer sequences for reverse transcription PCR.**

| Primer                                                                                     |                             | Source                          |
|--------------------------------------------------------------------------------------------|-----------------------------|---------------------------------|
| <i>Actb</i><br>(RefSeq: NM_007393.5)                                                       | FP: GCTTCTTTGCAGCTCCTTCGT   | Invitrogen Custom<br>DNA Oligos |
|                                                                                            | RP: CGTCATCCATGGCGAACTG     |                                 |
| <i>Arg1</i><br>(RefSeq: NM_007482.3)                                                       | FP: TACAAGACAGGGCTCCTTTCAG  | Invitrogen Custom<br>DNA Oligos |
|                                                                                            | RP: TGAGTTCCGAAGCAAGCCAA    |                                 |
| <i>Chit13</i><br>(RefSeq: NM_009892.3)                                                     | FP: AAGCTCTCCAGAAGCAATCC    | Invitrogen Custom<br>DNA Oligos |
|                                                                                            | RP: AGAAGAATTGCCAGACCTGTGA  |                                 |
| <i>Ldha</i><br>(RefSeq: NM_010699.2,<br>NM_001136069.2)                                    | FP: GAGACTTGCTGAGAGCATAA    | Eurofins genomics<br>(MWG)      |
|                                                                                            | RP: GATACATGGGACACTGAGGAA   |                                 |
| <i>Myc</i><br>(RefSeq: NM_010849.4)                                                        | FP: CAGCGACTCTGAAGAAGAGCA   | Invitrogen Custom<br>DNA Oligos |
|                                                                                            | RP: GACCTCTTGGCAGGGGTTTG    |                                 |
| <i>Nos2</i><br>(RefSeq: NM_010927.4,<br>NM_001313921.1, NM_001313922.1)                    | FP: TCCTGGACATTACGACCCCT    | Invitrogen Custom<br>DNA Oligos |
|                                                                                            | RP: CTCTGAGGGCTGACACAAGG    |                                 |
| <i>Pkm2</i><br>(RefSeq: NM_011099.4,<br>NM_001378868.1, NM_001378869.1,<br>NM_001378870.1) | FP: TGTCTGGAGAAACAGCCAAG    | Eurofins genomics<br>(MWG)      |
|                                                                                            | RP: CGAATAGCTGCAAGTGGTAGA   |                                 |
| <i>Retnla</i><br>(RefSeq: NM_020509.3)                                                     | FP: CAGCTGATGGTCCCAGTGAAT   | Invitrogen Custom<br>DNA Oligos |
|                                                                                            | RP: AGTGGAGGGATAGTTAGCTGG   |                                 |
| <i>Sdha</i><br>(RefSeq: NM_023281.1)                                                       | FP: GGAACACTCCTCAAAAACAGACC | Eurofins genomics<br>(MWG)      |
|                                                                                            | RP: CCACCACTGGGTATTGAGTAGAA |                                 |
| <i>Tbp</i><br>(RefSeq: NM_013684.3)                                                        | FP: CAGGAGCCAAGAGTGAAGAACA  | Invitrogen Custom<br>DNA Oligos |
|                                                                                            | RP: AAGAACTTAGCTGGGAAGCCC   |                                 |

1117
